1 Transgenerational inheritance of ethanol preference is caused by maternal  
2 NPF repression.

3 Julianna Bozler<sup>1</sup>, Balint Z Kacsóh<sup>1</sup>, Giovanni Bosco<sup>1\*</sup>

4 1. Geisel School of Medicine at Dartmouth, Molecular and Systems Biology, Hanover  
5 NH 03755

6 \*Corresponding author: [Giovanni.Bosco@Dartmouth.edu](mailto:Giovanni.Bosco@Dartmouth.edu)

7 **Summary**

8 Rapid or even anticipatory adaptation to environmental conditions can provide a decisive  
9 fitness advantage to an organism. The memory of recurring conditions could also benefit  
10 future generations, however neuronally-encoded behavior isn't thought to be inherited  
11 across generations. We tested the possibility that environmentally triggered  
12 modifications could allow "memory" of parental experiences to be inherited. In  
13 *Drosophila melanogaster*, exposure to predatory wasps leads to inheritance of a  
14 predisposition for ethanol-rich food for five generations. Inhibition of Neuropeptide-F  
15 (NPF) activates germline caspases required for transgenerational ethanol preference.  
16 Further, inheritance of low NPF expression in specific regions of F<sub>1</sub> brains is required for  
17 the transmission of this food preference: A maternally derived *NPF* locus is necessary for  
18 this phenomenon, implicating a maternal epigenetic mechanism of NPF-repression.  
19 Given the conserved signaling functions of NPF and its mammalian NPY homolog in  
20 drug and alcohol disorders, these observations raise the intriguing possibility of NPY-  
21 related transgenerational effects in humans.

22

23

## 24 **Introduction**

25           To what extent is personality and behavior predetermined at birth? Philosophers  
26 and scientists alike have struggled with this question, and many have settled on the *tabula*  
27 *rasa*, or *blank slate* perspective. This long-standing notion posits we are without form or  
28 direction until our individual experiences shape us. Over the past decades however,  
29 evidence has accumulated that suggests parental environment can have significant  
30 phenotypic consequences on the next generation, thus eroding this notion of a blank slate.  
31 The Dutch Hunger Winter Study was one of the first documented examples of ancestral  
32 experiences influencing subsequent generations. Children conceived in the Netherlands  
33 during the World War II blockade, and ensuing famine, had higher rates of obesity and  
34 diabetes (Heijmans et al., 2008; Schulz, 2010; Stein, Susser, Saenger, & Marolla,  
35 1975). More recent studies have found that neurological and mental health conditions  
36 also appear to have persistent impact on the next generations (Yeshurun & Hannan,  
37 2018). Further, risk factors for children of Holocaust survivors, such as reduced cortisol  
38 sensitivity has been linked to methylation state of the glucocorticoid receptor promoter,  
39 and increased methylation in offspring was associated with paternal diagnosis of  
40 posttraumatic stress disorder(Yehuda et al., 2014).

41           Studied largely in the public health context, there are limited examples of  
42 environmental inheritance that can be experimentally tested. Genetic model systems thus  
43 are indispensable for understanding molecular mechanisms of causation. For example,  
44 male mice trained to associate fear with an odor-transmitted sensitivity of this odor to  
45 their sons. In this instance, researchers concluded that offspring possessed an increased  
46 abundance of sensory neurons specific to the same odor their fathers were trained to fear

47 (Dias & Ressler, 2014). Similarly, environmental enrichment activities can ameliorate  
48 behavioral defects of mutant mice defective in long-term potentiation and memory, and  
49 this behavioral rescue is heritable to the next generation through the activation of an  
50 otherwise latent p38 signaling cascade (Arai, Li, Hartley, & Feig, 2009). Parental  
51 exposure to toxins and nutritional challenges also can change germline information,  
52 affecting growth and metabolism of future generations (Carone et al., 2010; Chen et al.,  
53 2016; Sharma et al., 2016; Skinner et al., 2013). These few examples suggest that  
54 parental environment can have a profound impact on subsequent generations. Elucidating  
55 mechanisms behind these environmentally triggered epigenetic programs is essential for a  
56 complete understanding of the foundational principles upon which biological inheritance  
57 is based.

58 *Drosophila melanogaster* females, when cohabitated with endoparasitoid wasps,  
59 shift to prefer ethanol food as an egg-laying substrate, where ethanol food protects  
60 *Drosophila* larvae from wasp (Kacsoh, Lynch, Mortimer, & Schlenke, 2013a).  
61 *Drosophila suzukii* similarly shifts egg-laying preference to food with atropine, giving its  
62 progeny protection against wasp (Poyet et al., 2017). Ethanol preference in *D.*  
63 *melanogaster* is linked to a decrease in Neuropeptide F (NPF) in the female brain  
64 (Kacsoh et al., 2013a), consistent with previous work on NPF (Shohat-Ophir, Kaun,  
65 Azanchi, Mohammed, & Heberlein, 2012), and its mammalian homolog NPY studied in  
66 the context of drug addiction (Gonçalves, Martins, Baptista, Ambrósio, & Silva, 2016;  
67 Landayan & Wolf, 2015). NPY modulation governs ethanol consumption in rats  
68 (Thiele, Marsh, Marie, Bernstein, & Palmiter, 1998) and is implicated in human alcohol  
69 abuse disorders (Mayfield et al., 2002; Mottagui-Tabar et al., 2005). This behavioral

70 output is believed to be a consequence of the NPF/NPY role in the rewards pathway, with  
71 NPF signaling being inherently rewarding (Desai, Upadhya, Subhedar, & Kokare,  
72 2013; Shao et al., 2017). NPF activity is considered representative of the motivational  
73 state of the fly (Krashes et al., 2009; Landayan & Wolf, 2015). Several recent studies  
74 also have shown that ‘stressful’ experiences regulate NPY/NPF levels, providing a link  
75 between environmental cues and NPF/NPY signaling (Broqua, Wettstein, Rocher,  
76 Gauthier-Martin, & Junien, 1995; Sah et al., 2009; Shohat-Ophir et al., 2012). Here  
77 we present findings that link maternal environmental conditions to cause inheritance of  
78 an altered reward pathway *via* depressed NPF signaling and preference for ethanol.

79

## 80 **Results**

### 81 **Inheritance of ethanol preference**

82 *Drosophila* were cohabitated with female wasps for four days, then separated and  
83 flies were placed into embryo collection chambers for 24 hours. Embryos were divided  
84 into two cohorts and each developed in the absence of adult flies or wasp. One cohort  
85 was used to propagate the next generation and never treated to ethanol food; the second  
86 cohort was used in the ethanol preference assay and then discarded (Fig. 1a).

87 Wasp-exposed Canton-S flies lay approximately 94% of their eggs on ethanol  
88 food (Fig. 1b). This behavior persists in their offspring despite the F<sub>1</sub> generation never  
89 having direct interaction with wasps (Fig. 1b). Ethanol preference in F<sub>1</sub> was less potent,  
90 with 73% of the eggs laid on ethanol food ( $p = 8.6e^{-7}$ , Table S1). Remarkably, this  
91 inherited ethanol preference persisted for five generations, gradually reverting back to the  
92 mock exposed baseline (Fig. 1b). These observations were replicated in an additional

93 wild type Oregon R (OR) strain (Table S2), suggesting that the phenomenon is not  
94 specific to a particular genetic aberration or background. This indicates that inheritance  
95 of ethanol preference is not a permanent germline change, but rather it is a reversible  
96 trait. Ethanol preference was measured for two days for initial experiments (Fig. 1-3 &  
97 S1); day one and day two showed similar trends, suggesting that flies do not habituate to  
98 ethanol nor does the preference fade over the course of the experiment (Table S3).

99         Confirming previous findings, following a wasp exposure  $F_0$  flies have an ethanol  
100 preference that persists for more than a week, returning to baseline after ten days (Fig.  
101 S1a). Sister cohorts of  $F_1$  flies were collected at two time points along this  $F_0$  ethanol  
102 preference decay; one immediately following wasp exposure (brood 1), and the second  
103 ten days post wasp exposure (brood 2). Brood 2 did not display an inherited ethanol  
104 preference, suggesting that wasp exposure does not inflict a permanent change in the  $F_0$   
105 germline (Fig. S1d). Again, these findings replicated in OR flies (Table S2), indicating  
106 that these observations are robust and not dependent on the context of a particular genetic  
107 background.

108         To explore further the role of time and dynamics of wasp exposure, multiple  
109 generations of flies were exposed to wasps. We found that inherited ethanol preference  
110 can be enhanced with successive generations of wasp exposure (Fig. S1e). This trend did  
111 not repeat when nonconsecutive generations were repeatedly exposed to wasps (Fig. S1f).  
112 This suggests that the enhancing effect observed in the successive exposures is time  
113 sensitive and may be linked to the ethanol preference of the parental flies.

114         To explore the required neural signaling to the germline, mutants defective for  
115 long-term memory were assayed. Previous studies have shown that flies defective in

116 long-term memory exhibit an ethanol preference only in the presence of wasps but not  
117 after wasp removal. The long-term memory mutant *Orb2<sup>ΔQ</sup>* produced offspring with an  
118 ethanol preference when the embryo collection was conducted in the presence of wasps,  
119 but this ethanol preference was greatly reduced in offspring collected post-wasp exposure  
120 (Fig. 1c). These data provide insight in two ways. First, functional long-term memory is  
121 not a compulsory requirement to generate ethanol-preferring offspring. Secondly, intact  
122 long-term memory is not required to inherit ethanol preference. Given that ethanol  
123 preference in the absence of wasps is long-term memory dependent, this experiment  
124 reveals that the neuronal signaling is different for maintained ethanol preference in the F<sub>0</sub>  
125 and F<sub>1</sub> flies(Bozler et al., 2017).

126         Several other factors point to distinctions between the F<sub>0</sub> and F<sub>1</sub> ethanol  
127 preference behavior. Male F<sub>1</sub> legacy flies, mated to naïve females produced offspring  
128 with an ethanol preference (Fig. S2a). Additionally, 14-16 day old F<sub>1</sub> flies displayed an  
129 ethanol preference, demonstrating that F<sub>1</sub> flies do not have an ethanol preference decay  
130 curve similar to that of the F<sub>0</sub> (Fig. S2b).

131

### 132 **Transcriptional changes**

133 Global transcriptional changes in the female head across generations were examined with  
134 RNA sequencing. Heads from the F<sub>1</sub> and F<sub>2</sub> generation were collected and compared  
135 with the F<sub>0</sub> generation, which was previously reported (Bozler et al., 2017). Analysis of  
136 the F<sub>0</sub> data detected 98 differentially expressed transcripts (15 down and 83 up) (Fig. S3,  
137 Table S4). F<sub>1</sub> and F<sub>2</sub> heads showed very few differentially expressed transcripts, 4 and 5  
138 transcripts respectively. Of the differentially expressed transcripts, no transcript was

139 shared between groups. These data indicate that although wasp exposure itself results in  
140 global transcriptional changes in the female head, this observation does not hold true for  
141 the subsequent generations.

142

### 143 **Germline caspases are necessary**

144 Mid-oogenesis germline apoptosis (stage 7-8 oocytes) is triggered upon wasp exposure  
145 (Fig. 2a) (Kacsoh, Bozler, & Bosco, 2018; Kacsoh et al., 2018; Kacsoh, Bozler,  
146 Ramaswami, & Bosco, 2015). However, this wasp response is not heritable like the  
147 ethanol preference behavior, and F<sub>1</sub> females do not exhibit germline apoptosis (Fig. 2a).  
148 Nevertheless, maternal germline knockdown of effector caspases *Dcp-1* and *drice*  
149 produce offspring without an ethanol preference, regardless of parental treatment (Fig.  
150 2c). Although protein-starvation triggers germline apoptosis similar to wasp exposure  
151 (Fig. 2b), offspring from mothers with starvation-induced apoptosis do not inherit an  
152 ethanol preference (Fig. 2d). This indicates that germline apoptosis in and of itself is not  
153 sufficient for inheritance of ethanol preference.

154

### 155 **NPF and its receptor modulate germline apoptosis**

156 NPF is known to play a role in food seeking, ethanol consumption, and numerous other  
157 reward pathways, and NPF levels decrease in the fan shaped body of female brains  
158 following wasp exposure (Kacsoh, Lynch, Mortimer, & Schlenke, 2013b). Even in the  
159 presence of wasp overexpression of NPF inhibits ethanol preference, while in the absence  
160 of wasp knockdown of NPF is sufficient to induce the ethanol preference behavior (Fig.  
161 3a). Given this NPF modulation of ethanol preference in females we asked whether NPF

162 also signaled to germline cells, triggering caspases and apoptosis. Strikingly, NPF  
163 knockdown induces mid-oogenesis apoptosis in the absence of wasps (Fig. 3b), while  
164 overexpression of NPF results in no elevation in germline apoptosis even in the presence  
165 of wasps (Fig. 3b). Similarly, NPF-receptor (NPFR) knockdown alone leads to  
166 significantly elevated levels of apoptosis (28%, when compared to parental line controls  
167  $p = 6.2e^{-4}$  &  $1.5e^{-4}$ ), and this effect is enhanced with wasp exposure (61%,  $p = 7.0e^{-4}$ )  
168 (Fig. 3c). Taken together these observations link ethanol preference behavior and mid-  
169 oogenesis apoptosis in the  $F_0$  females, both processes likely caused by changes in NPF  
170 and NPFR signaling.

171

## 172 **Changes in NPF trigger transgenerational inheritance of ethanol preference**

173 The NPF-triggered changes in  $F_0$  behavior and germline also correlate with  
174 observed changes in offspring.  $F_1$  flies from mothers with NPF knockdown exhibit  
175 ethanol preference, even in the absence of wasp exposure (Fig. 3d). Inherited ethanol  
176 preference is enhanced when the parental NPF knockdown flies are exposed to wasps  
177 (Fig. 3d). By contrast, NPF overexpression in  $F_0$  mothers exposed to wasp produced  
178 offspring lacking the ethanol preference (Fig. 3d). NPFR knockdown experiments mirror  
179 these findings: Maternal NPFR knockdown produces offspring with an ethanol  
180 preference compared to unexposed control lines, again this effect is enhanced when  
181 NPFR knockdown is paired with wasp exposure (Fig. 3e). Interestingly, overexpression  
182 of NPF in  $F_1$  flies blocks ethanol preference in the exposed  $F_1$  legacy group (Fig. 3f),  
183 raising the possibility that  $F_1$  legacy flies inherit NPF in a repressed or low expression  
184 state.



185 We therefore speculated that regulation or depression of NPF might be a means of  
186 this behavioral inheritance. Global changes in NPF RNA were not detected in either the  
187 F<sub>0</sub> or F<sub>1</sub> female heads (Fig. S4). However, antibody staining allowed for a region specific  
188 examination of NPF protein levels (Fig. 4a). Anti-NPF signal has clear overlap with the  
189 NPF-Gal4 driving the cd8-GFP reporter (Fig. 4a). The fan shaped body has previously  
190 been implicated in ethanol preference, and therefore was a focus in this  
191 experiment(Kacsoh et al., 2013a). NPF protein levels measured through  
192 immunofluorescence were significantly reduced in the fan shaped body of F<sub>0</sub>, F<sub>1</sub>, and F<sub>2</sub>  
193 (two-generations exposed) flies (Fig. 4b). We note that NPF was not reduced in all  
194 regions of the F<sub>1</sub> and F<sub>2</sub> brains, as intensity of P1 neurons was not reduced in either the F<sub>1</sub>  
195 or F<sub>2</sub> flies, although significant reduction was observed in P1 neurons of F<sub>0</sub> flies (Fig. 4c).

196 Given the observed link between depressed NPF and oocyte apoptosis, it is  
197 notable that F<sub>1</sub> flies do not have germline apoptosis. It is possible that apoptosis is due to  
198 a localized decrease in NPF not shared between the two generations; perhaps the  
199 apoptosis is triggered by other NPF neurons or synapses. It is also conceivable that other  
200 neural processes are altered in the flies that we did not detect, decoupling the apoptosis  
201 and ethanol preference behaviors in the later generations.

202

### 203 **Maternal Chromosomal Inheritance of Ethanol Preference Behavior**

204 To determine whether maternal or paternal exposure were equally important for  
205 transgenerational inheritance of ethanol preference, wasp-exposure and mating were  
206 controlled in two separate experiments. First, mated females were exposed to wasps in  
207 the absence of male flies. Second, wasp-exposed males were mated to naïve virgin

208 females, removing the maternal exposure as a factor. Interestingly, F<sub>1</sub> offspring from  
209 exclusively maternal wasp exposure inherit ethanol preference while F<sub>1</sub> offspring from  
210 exclusively paternal exposures did not (Fig. 5a). We have previously reported that female  
211 flies require sight to induce a behavioral response to wasp exposure (Kacsoh et al., 2015).  
212 In further support of the maternal contribution to the inheritance of ethanol preference,  
213 blind female flies did not produce offspring with an ethanol preference (Fig. 5b). In the  
214 reciprocal experiment, blind fathers did generate ethanol-preferring offspring following a  
215 wasp exposure (Fig. 5b).

216         Maternal epigenetic inheritance of ethanol preference could be conferred by  
217 chromosomal elements and/or cytoplasmic factors. If ethanol preference is inherited  
218 through a chromatin mark then chromosome parental-origin tests should reveal a  
219 requirement for maternal chromosomal inheritance; however, if inheritance is conferred  
220 through cytoplasmic factors, such as noncoding-RNAs, then passage of all chromosomes  
221 through paternal gametes should have no effect since wasp-exposed females can still  
222 maternally deposit molecules and organelles into the oocyte. To test what maternal  
223 components may be conferring inheritance of ethanol preference we first focused on  
224 chromosomal elements using attached or compound chromosomes. Flies where each of  
225 the two homologs are fused cannot make haplo-chromosome gametes. Instead, they can  
226 only make gametes with one or zero copies of the fused chromosome, and therefore F<sub>1</sub>  
227 flies inherit "pairs" of homologs that are entirely maternally or paternally derived (Fig.  
228 5c). In this manner, we tested each of the two major autosomes for parent-of-origin  
229 effects. Using phenotypic markers, flies were sorted as having either a maternal or  
230 paternal exclusive homolog pair and assayed for ethanol preference. Chromosome-II

231 fusion flies had similar results when inheriting exclusively maternal or paternal  
232 Chromosome-II elements (Fig. 5c). Chromosome-III fusion flies also had inheritance of  
233 ethanol preference when receiving both copies of Chromosome-III maternally. However,  
234 flies with both copies of Chromosome-III from their fathers failed to inherit an ethanol  
235 preference (Fig. 5d). This observation has at least three implications: Most importantly,  
236 this indicates that some element on Chromosome-III must be inherited from wasp-  
237 exposed mothers in order for ethanol preference behavior to be passed on to F<sub>1</sub> legacy  
238 flies. This also suggests that maternal copies of the Chromosome-X, Chromosome-II or  
239 cytoplasmic factors, if important, are not sufficient for inheritance of ethanol preference.  
240 Lastly, that oocytes giving rise to eggs with zero copies of maternal Chromosome-II still  
241 confer ethanol preferences indicates that exclusion of maternal chromosomes itself does  
242 not generally interfere with transgenerational inheritance.

243

#### 244 **A Maternal NPF Locus is Required for Epigenetic Inheritance**

245 To further delineate what parts of maternally derived Chromosome-III were required for  
246 transgenerational inheritance of ethanol preference we tested chromosomes with well  
247 defined deletions. As NPF has previously been shown to control ethanol preference  
248 behavior, we speculated that the NPF locus on Chromosome-III may be a target of  
249 maternal epigenetic reprogramming(Shohat-Ophir et al., 2012). We also observed that  
250 F<sub>1</sub> legacy flies inherit low levels of NPF expression specifically in the fan shaped body of  
251 the brain (Fig. 4a-b), consistent with the possibility that F<sub>1</sub> flies inherit repressed NPF  
252 expression. If the critical maternal Chromosome-III element is the NPF gene locus, then  
253 F<sub>1</sub> offspring with maternal deletions of this chromosomal region may prevent inheritance

254 of ethanol preference, much like not having inherited any maternal copies of  
255 Chromosome-III (Fig. 5d). Using females with one Chromosome-III carrying a large  
256 deletion of the NPF gene region and one copy of wild-type NPF on a balancer  
257 Chromosome-III allowed us to ask whether an intact maternal NPF gene region was  
258 necessary for F<sub>1</sub> inheritance of ethanol preference. We found that legacy F<sub>1</sub> flies from  
259 unexposed mothers had no preference for ethanol, regardless of whether they inherited an  
260 intact NPF gene on a balancer chromosome or a chromosomal deletion of the NPF region  
261 (Fig. 5e-f). Legacy F<sub>1</sub> flies from exposed mothers inheriting a wild-type NPF on a  
262 balancer chromosome exhibited a strong preference for ethanol, suggesting that multiple  
263 rearrangements, deletions and mutations of a balancer Chromosome-III are not sufficient  
264 to prevent ethanol preference in F<sub>1</sub> flies. By contrast, legacy F<sub>1</sub> flies from exposed  
265 mothers inheriting a Chromosome-III deletion of the NPF gene region do not inherit any  
266 preference for ethanol (Fig. 5f). This was true for two different Chromosome-III deletions  
267 at the NPF locus, whereas a Chromosome-III deletion that does not disrupt the NPF gene  
268 had no effect (Fig. 5f). Paternally inherited Chromosome-III deletions were not sufficient  
269 to prevent ethanol preference in F<sub>1</sub> flies (Fig. 5f).

270

## 271 **Discussion**

272       Perhaps the blank slate has more written on it than we once thought. Indeed it  
273 would appear that animals are bound to their ancestors in a way that some might consider  
274 Lamarckian (Galloway & Etterson, 2007; Herman & Sultan, 2011; J Marshall & Uller,  
275 2007). The ethanol preference we observed in this study is heritable but modifiable and  
276 responsive to environmental cues, as it can be enhanced or decay across generations. Our

277 data suggest that there is an ultimate return to pre-wasp exposed state by the  $F_6$   
278 generation. If there are lingering effects of wasp exposure beyond this generation, they  
279 are not detected in our assays. Not only does the ethanol preference behavior revert to  
280 unexposed levels, but we also detected no priming or enhancement effect in the  $F_8$   
281 generation following a second wasp exposure (Fig S1f).

282 Inheritance of ethanol preference requires several factors: We found that the  
283 initiation of the epigenetic program in the founding generation ( $F_0$ ) is maternal in nature,  
284 and requires effector caspases in the female germline. However, continuation of the  
285 epigenetic program throughout the remaining generations is distinctly different in several  
286 ways. Both male and female progeny ( $F_1$ ) are able to pass on ethanol preference to their  
287 offspring. Although, it is possible that the  $F_1$  generation requires germline effector  
288 caspases for the transmission of the ethanol preference, the lack of female germline  
289 apoptosis and paternal ability to confer this behavior points to a caspase-independent  
290 maintenance mechanism. A further and curious distinction between the generations is in  
291 the ethanol preference itself, as it persists in the  $F_1$  generation, rather than mirroring the  
292  $F_0$  generation and decaying over 10 days.

293 The unifying mechanism behind many of these observations is the central role of  
294 NPF signaling in this system. Governing both germline apoptosis and the ethanol  
295 preference neuronal NPF signaling modulates the ethanol preference as well as its  
296 inheritance. Maternal imprinting of the NPF locus or nearby regions has a dominant  
297 effect, leading to the possibility that the  $F_1$  paternal locus is imprinted in *trans*. It is  
298 tempting to speculate on the role of canonical imprinting mechanisms, such as the

299 Polycomb repressive complexes, although a molecular apparatus remains elusive for the  
300 time being.

301         This multi-generational ethanol preference underscores the importance of  
302 environmental conditions on behavior and physiology. Numerous studies have indicated  
303 that we may need to look beyond the individual, to longer lasting and persistent effects of  
304 environmental stresses. This study illustrates the complexity of inheritance and  
305 highlights the incredible resiliency and plasticity of organisms to adapt to changing  
306 circumstance. Of particular interest is the conserved functions of NPF and its mammalian  
307 homolog NPY in modulating a variety of human behaviors, including stress responses  
308 and alcohol abuse disorders (Thorsell & Mathé, 2017). Our studies raise the intriguing  
309 possibility that NPF/NPY and their receptors could be subjected to epigenetically  
310 modified states determined by parental environment and experience. Germline  
311 inheritance of epigenetically modified neuro-signaling networks, such as those modulated  
312 by NPF/NPY, could be one mechanism through which trans-generational inheritance of  
313 behavioral predispositions persist, as reported here for *Drosophila*. It should be noted that  
314 such epigenetically inherited behaviors that persist for multiple generations could be  
315 interpreted as dominant familial genetic traits. If mammalian NPY is inherited in  
316 epigenetically modified states, then this would require a fundamental change in how we  
317 study and view inheritance of NPY-related behavioral disorders and possible effects of  
318 parental environment.

319  
320

321

## References

- 322 Aken, B. L., Achuthan, P., Akanni, W., Amode, M. R., Bernsdorff, F., Bhai, J., et al.  
323 (2016). Ensembl 2017. *Nucleic Acids Research*, 45(D1), D635-D642.
- 324 Arai, J. A., Li, S., Hartley, D. M., & Feig, L. A. (2009). Transgenerational rescue of a  
325 genetic defect in long-term potentiation and memory formation by juvenile  
326 enrichment. *The Journal of Neuroscience : The Official Journal of the Society for*  
327 *Neuroscience*, 29(5), 1496-1502. doi:10.1523/JNEUROSCI.5057-08.2009 [doi]
- 328 Bozler, J., Kacsóh, B. Z., Chen, H., Theurkauf, W. E., Weng, Z., & Bosco, G. (2017). A  
329 systems level approach to temporal expression dynamics in drosophila reveals  
330 clusters of long term memory genes. *PLoS Genetics*, 13(10), e1007054.
- 331 Bray, N. L., Pimentel, H., Melsted, P., & Pachter, L. (2016). Near-optimal probabilistic  
332 RNA-seq quantification. *Nature Biotechnology*, 34(5), 525.
- 333 Broqua, P., Wettstein, J., Rocher, M., Gauthier-Martin, B., & Junien, J. (1995).  
334 Behavioral effects of neuropeptide Y receptor agonists in the elevated plus-  
335 maze and fear-potentiated startle procedures. *Behavioural Pharmacology*,
- 336 Carone, B. R., Fauquier, L., Habib, N., Shea, J. M., Hart, C. E., Li, R., et al. (2010).  
337 Paternally induced transgenerational environmental reprogramming of  
338 metabolic gene expression in mammals. *Cell*, 143(7), 1084-1096.
- 339 Chen, Q., Yan, M., Cao, Z., Li, X., Zhang, Y., Shi, J., et al. (2016). Sperm tsRNAs  
340 contribute to intergenerational inheritance of an acquired metabolic disorder.

- 341 *Science (New York, N.Y.), 351(6271), 397-400. doi:10.1126/science.aad7977*  
342 [doi]
- 343 Desai, S. J., Upadhyya, M. A., Subhedar, N. K., & Kokare, D. M. (2013). NPY mediates  
344 reward activity of morphine, via NPY Y1 receptors, in the nucleus accumbens  
345 shell. *Behavioural Brain Research, 247*, 79-91.
- 346 Dias, B. G., & Ressler, K. J. (2014). Parental olfactory experience influences behavior  
347 and neural structure in subsequent generations. *Nature Neuroscience, 17*(1), 89.
- 348 Galloway, L. F., & Etterson, J. R. (2007). Transgenerational plasticity is adaptive in  
349 the wild. *Science (New York, N.Y.), 318*(5853), 1134-1136. doi:318/5853/1134  
350 [pii]
- 351 Gonçalves, J., Martins, J., Baptista, S., Ambrósio, A. F., & Silva, A. P. (2016). Effects of  
352 drugs of abuse on the central neuropeptide Y system. *Addiction Biology, 21*(4),  
353 755-765.
- 354 Heijmans, B. T., Tobi, E. W., Stein, A. D., Putter, H., Blauw, G. J., Susser, E. S., et al.  
355 (2008). Persistent epigenetic differences associated with prenatal exposure to  
356 famine in humans. *Proceedings of the National Academy of Sciences, 105*(44),  
357 17046-17049.
- 358 Herman, J. J., & Sultan, S. E. (2011). Adaptive transgenerational plasticity in plants:  
359 Case studies, mechanisms, and implications for natural populations. *Front Plant*  
360 *Sci, 2*, 1-10.



- 361 J Marshall, D., & Uller, T. (2007). When is a maternal effect adaptive? *Oikos*, 116(12),  
362 1957-1963.
- 363 Kacsoh, B. Z., Barton, S., Jiang, Y., Zhou, N., Mooney, S. D., Friedberg, I., et al. (2018).  
364 New drosophila long-term memory genes revealed by assessing computational  
365 function prediction methods. *bioRxiv*, , 414565.
- 366 Kacsoh, B. Z., Bozler, J., & Bosco, G. (2018). Drosophila species learn dialects through  
367 communal living. *PLoS Genetics*, 14(7), e1007430.
- 368 Kacsoh, B. Z., Bozler, J., Hodge, S., Ramaswami, M., & Bosco, G. (2015). A novel  
369 paradigm for nonassociative long-term memory in drosophila: Predator-  
370 induced changes in oviposition behavior. *Genetics*, 199(4), 1143-1157.  
371 doi:10.1534/genetics.114.172221 [doi]
- 372 Kacsoh, B. Z., Bozler, J., Ramaswami, M., & Bosco, G. (2015). Social communication of  
373 predator-induced changes in drosophila behavior and germ line physiology.  
374 *eLife*, 4, 10.7554/eLife.07423. doi:10.7554/eLife.07423 [doi]
- 375 Kacsoh, B. Z., Lynch, Z. R., Mortimer, N. T., & Schlenke, T. A. (2013a). Fruit flies  
376 medicate offspring after seeing parasites. *Science (New York, N.Y.)*, 339(6122),  
377 947-950. doi:10.1126/science.1229625 [doi]
- 378 Kacsoh, B. Z., Lynch, Z. R., Mortimer, N. T., & Schlenke, T. A. (2013b). Fruit flies  
379 medicate offspring after seeing parasites. *Science (New York, N.Y.)*, 339(6122),  
380 947-950. doi:10.1126/science.1229625 [doi]

- 381 Krashes, M. J., DasGupta, S., Vreede, A., White, B., Armstrong, J. D., & Waddell, S.  
382 (2009). A neural circuit mechanism integrating motivational state with memory  
383 expression in drosophila. *Cell*, *139*(2), 416-427.
- 384 Landayan, D., & Wolf, F. W. (2015). Shared neurocircuitry underlying feeding and  
385 drugs of abuse in drosophila. *Biomedical Journal*, *38*(6), 496-509.
- 386 Mayfield, R. D., Lewohl, J. M., Dodd, P. R., Herlihy, A., Liu, J., & Harris, R. A. (2002).  
387 Patterns of gene expression are altered in the frontal and motor cortices of  
388 human alcoholics. *Journal of Neurochemistry*, *81*(4), 802-813.
- 389 Mottagui-Tabar, S., Prince, J. A., Wahlestedt, C., Zhu, G., Goldman, D., & Heilig, M.  
390 (2005). A novel single nucleotide polymorphism of the neuropeptide Y (NPY)  
391 gene associated with alcohol dependence. *Alcoholism: Clinical and Experimental*  
392 *Research*, *29*(5), 702-707.
- 393 Pimentel, H., Bray, N. L., Puente, S., Melsted, P., & Pachter, L. (2017). Differential  
394 analysis of RNA-seq incorporating quantification uncertainty. *Nature Methods*,  
395 *14*(7), 687.
- 396 Poyet, M., Eslin, P., Chabrierie, O., Prud'homme, S., Desouhant, E., & Gibert, P. (2017).  
397 The invasive pest drosophila suzukii uses trans-generational medication to  
398 resist parasitoid attack. *Scientific Reports*, *7*, 43696.

- 399 Sah, R., Ekhtator, N. N., Strawn, J. R., Sallee, F. R., Baker, D. G., Horn, P. S., et al. (2009).  
400 Low cerebrospinal fluid neuropeptide Y concentrations in posttraumatic stress  
401 disorder. *Biological Psychiatry*, 66(7), 705-707.
- 402 Schulz, L. C. (2010). The dutch hunger winter and the developmental origins of  
403 health and disease. *Proceedings of the National Academy of Sciences of the United*  
404 *States of America*, 107(39), 16757-16758. doi:10.1073/pnas.1012911107 [doi]
- 405 Shao, L., Saver, M., Chung, P., Ren, Q., Lee, T., Kent, C. F., et al. (2017). Dissection of  
406 the drosophila neuropeptide F circuit using a high-throughput two-choice  
407 assay. *Proceedings of the National Academy of Sciences of the United States of*  
408 *America*, 114(38), E8091-E8099. doi:10.1073/pnas.1710552114 [doi]
- 409 Sharma, U., Conine, C. C., Shea, J. M., Boskovic, A., Derr, A. G., Bing, X. Y., et al. (2016).  
410 Biogenesis and function of tRNA fragments during sperm maturation and  
411 fertilization in mammals. *Science (New York, N.Y.)*, 351(6271), 391-396.  
412 doi:10.1126/science.aad6780 [doi]
- 413 Shohat-Ophir, G., Kaun, K. R., Azanchi, R., Mohammed, H., & Heberlein, U. (2012).  
414 Sexual deprivation increases ethanol intake in drosophila. *Science (New York,*  
415 *N.Y.)*, 335(6074), 1351-1355. doi:10.1126/science.1215932 [doi]
- 416 Skinner, M. K., Manikkam, M., Tracey, R., Guerrero-Bosagna, C., Haque, M., & Nilsson,  
417 E. E. (2013). Ancestral dichlorodiphenyltrichloroethane (DDT) exposure  
418 promotes epigenetic transgenerational inheritance of obesity. *BMC Medicine*,  
419 11(1), 228.

- 420 Stein, Z., Susser, M., Saenger, G., & Marolla, F. (1975). Famine and human  
421 development: The dutch hunger winter of 1944-1945.
- 422 Thiele, T. E., Marsh, D. J., Marie, L. S., Bernstein, I. L., & Palmiter, R. D. (1998). Ethanol  
423 consumption and resistance are inversely related to neuropeptide Y levels.  
424 *Nature*, 396(6709), 366.
- 425 Thorsell, A., & Mathé, A. A. (2017). Neuropeptide Y in alcohol addiction and affective  
426 disorders. *Frontiers in Endocrinology*, 8, 178.
- 427 Yehuda, R., Daskalakis, N. P., Lehrner, A., Desarnaud, F., Bader, H. N., Makotkine, I., et  
428 al. (2014). Influences of maternal and paternal PTSD on epigenetic regulation of  
429 the glucocorticoid receptor gene in holocaust survivor offspring. *American*  
430 *Journal of Psychiatry*, 171(8), 872-880.
- 431 Yeshurun, S., & Hannan, A. J. (2018). Transgenerational epigenetic influences of  
432 paternal environmental exposures on brain function and predisposition to  
433 psychiatric disorders. *Molecular Psychiatry*, , 1.
- 434
- 435
- 436
- 437

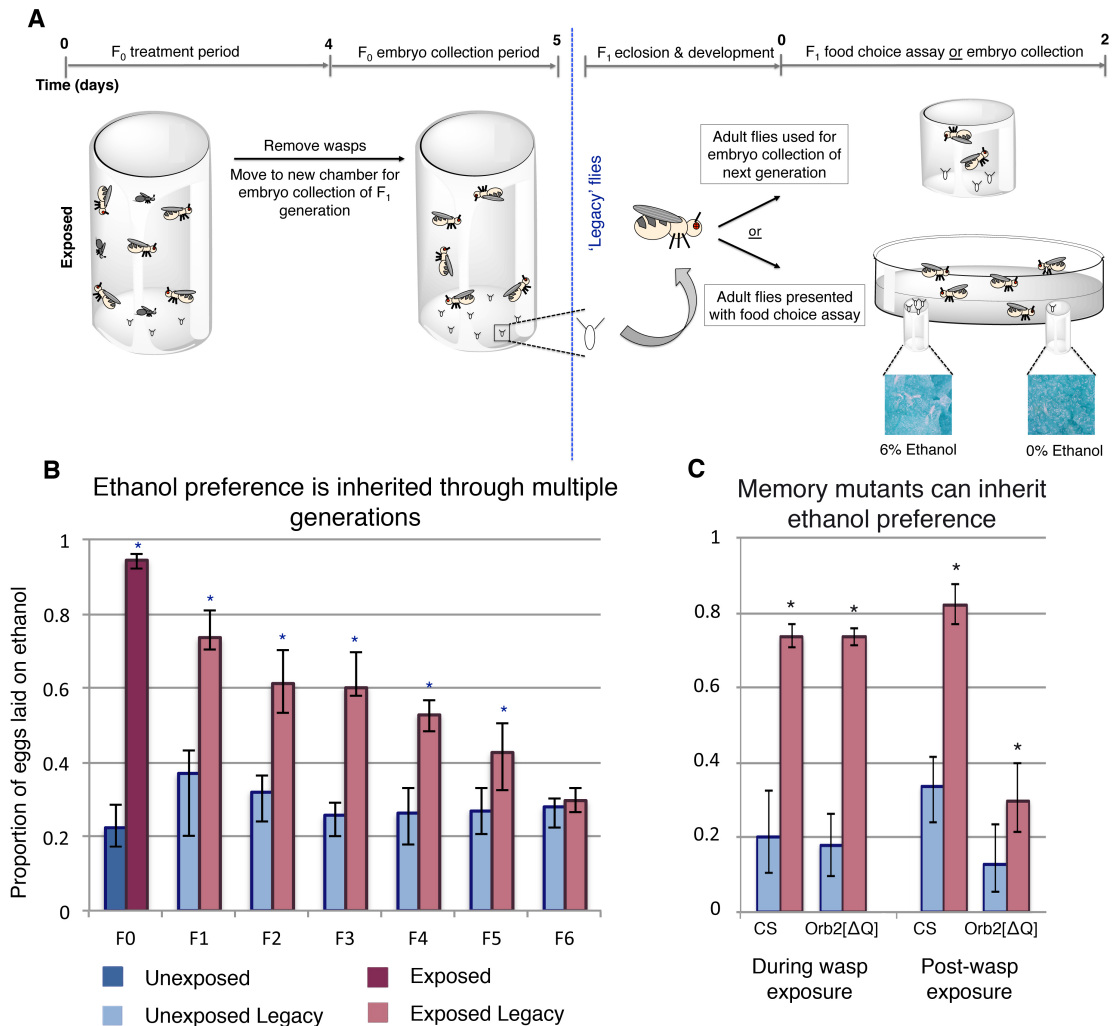

438  
439  
440  
441  
442  
443  
444  
445  
446  
447  
448  
449  
450  
451  
452  
453  
454  
455

**Figure 1. Maternally inherited ethanol preference persists for multiple generations.**

Schematic of experimental design is shown (A). Flies are exposed to wasps for a period of four days prior to egg collection. The descendants from either wasp-exposed or unexposed treatment groups, termed ‘legacy’ flies, are reared until maturity in the absence of both wasps and parental exposure. Legacy flies are either used to propagate the next generation, or are assayed for ethanol preference. Flies from a particular generation are referred to as  $F_n$ , where  $n$  denotes the number of generations removed from the treatment. For example, the treatment group itself is  $F_0$ , whereas their direct offspring are  $F_1$ . Ethanol preference is quantified as proportion of eggs laid on ethanol (B), illustrating that this behavior is heritable through the  $F_5$  generation. Flies with deficient long-term memory were tested for transgenerational inheritance of ethanol (C). Asterisk indicates  $p$ -value of  $<0.05$ .

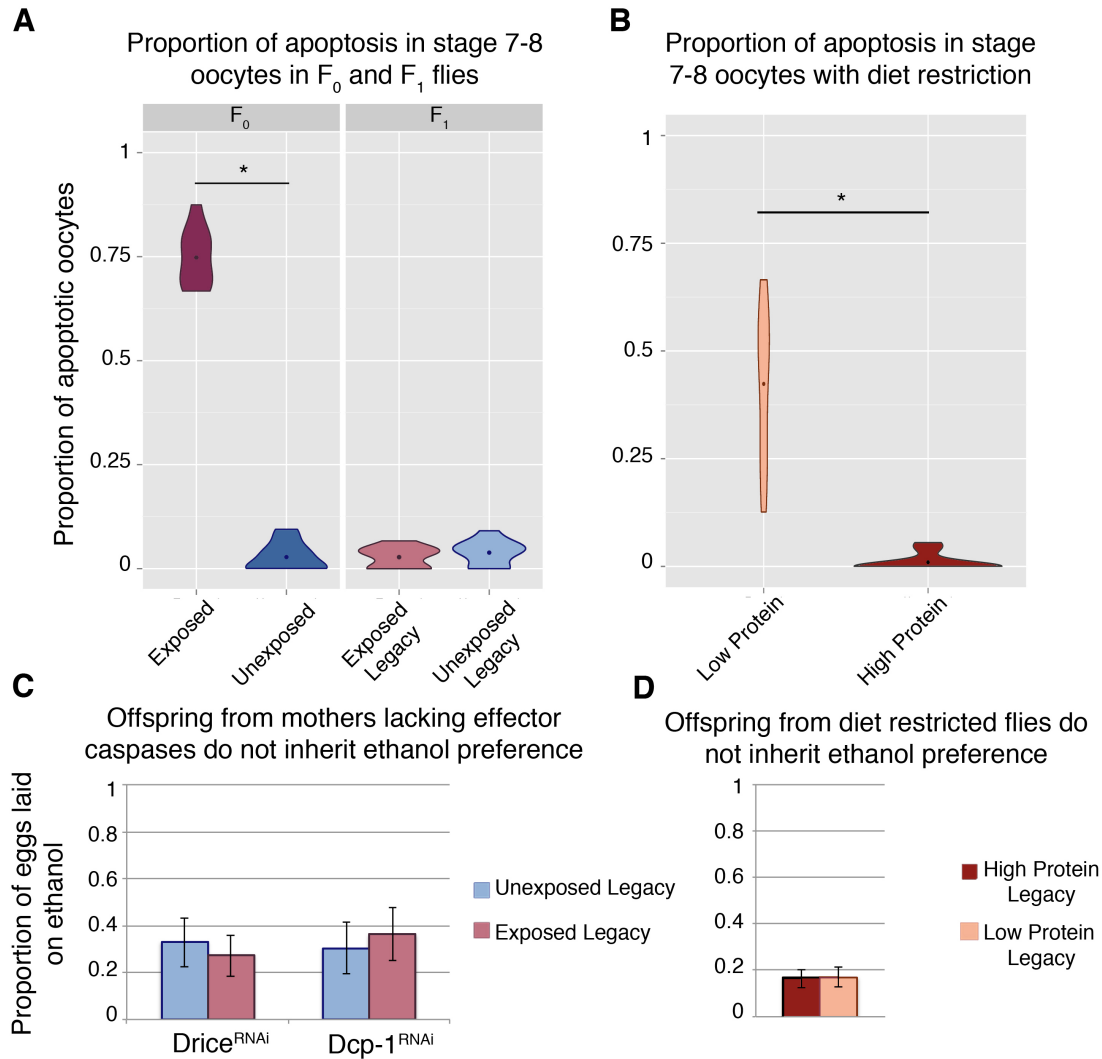

457

458 Figure 2. Germline apoptosis and activated caspases play a role in the inheritance of ethanol  
459 preference. Apoptosis in stage 7-8 egg chambers was quantified in  $F_0$  and  $F_1$  (legacy) flies (**A**).  
460 Flies fed a protein-restricted diet have elevated levels of stage 7-8 oocyte apoptosis (**B**). Ethanol  
461 preference is not inherited from mothers with *Dcp-1* or *Drice* knockdown (**C**). Offspring from  
462 protein-restricted parents don't inherit an ethanol preference (**D**). Points within violin plots  
463 denote the group mean. Asterisk indicates a p-value of <0.05.

464

465

466

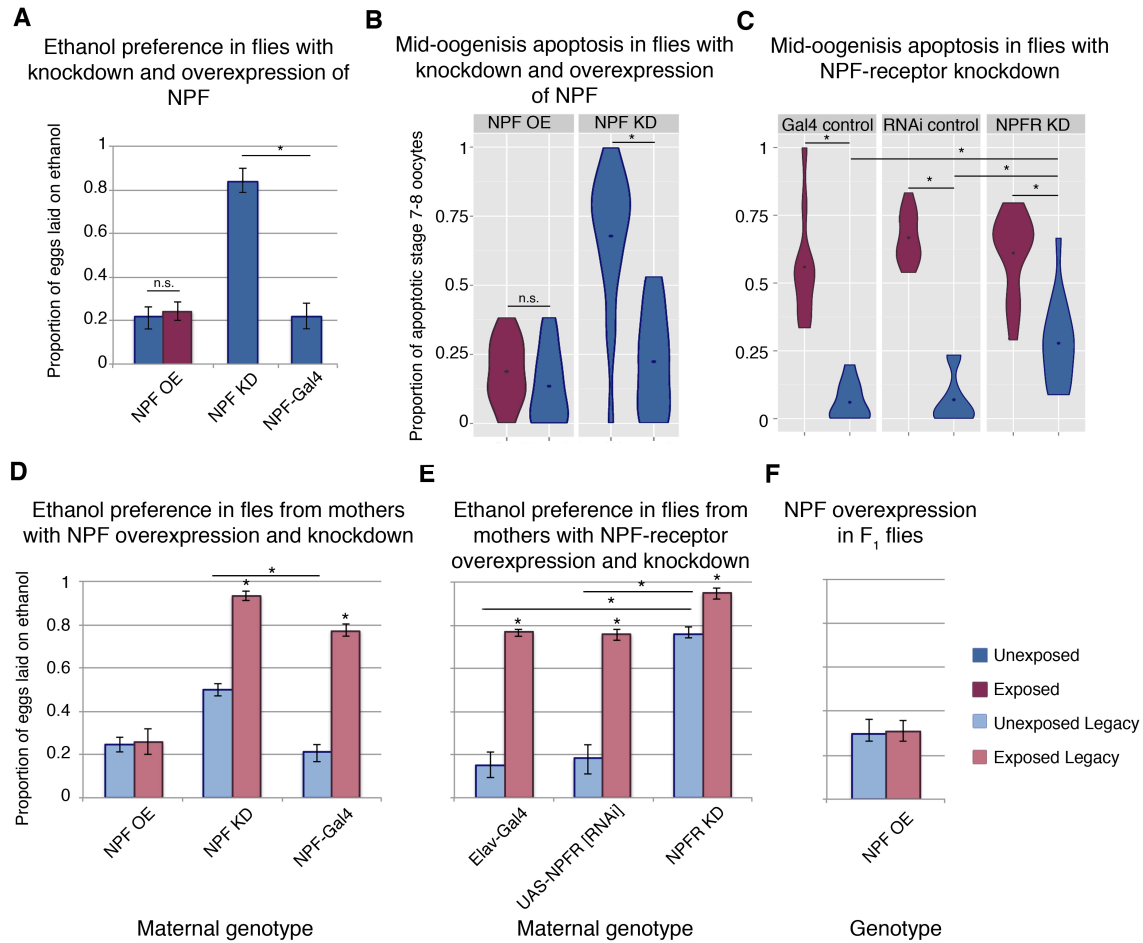

467

468 **Figure 3. NPF affects ethanol preference and germline apoptosis.** NPF overexpression (OE) or  
 469 knockdown (KD) can alter ethanol preference (A). Genetic manipulation of NPF levels can alter  
 470 levels of germline apoptosis (B). Knockdown of NPF receptor leads to increased germline  
 471 apoptosis (C). F<sub>1</sub> legacy flies have altered ethanol preference depending on the maternal NPF  
 472 genotype (D). F<sub>1</sub> exposed and unexposed legacy flies inherit ethanol preference from mothers  
 473 with NPF receptor knockdown (E). F<sub>1</sub> legacy flies overexpressing NPF do not inherit an ethanol  
 474 preference (F). Points within violin plots denote the group mean. Asterisk indicates a p-value of  
 475 <0.05.

476

477

478

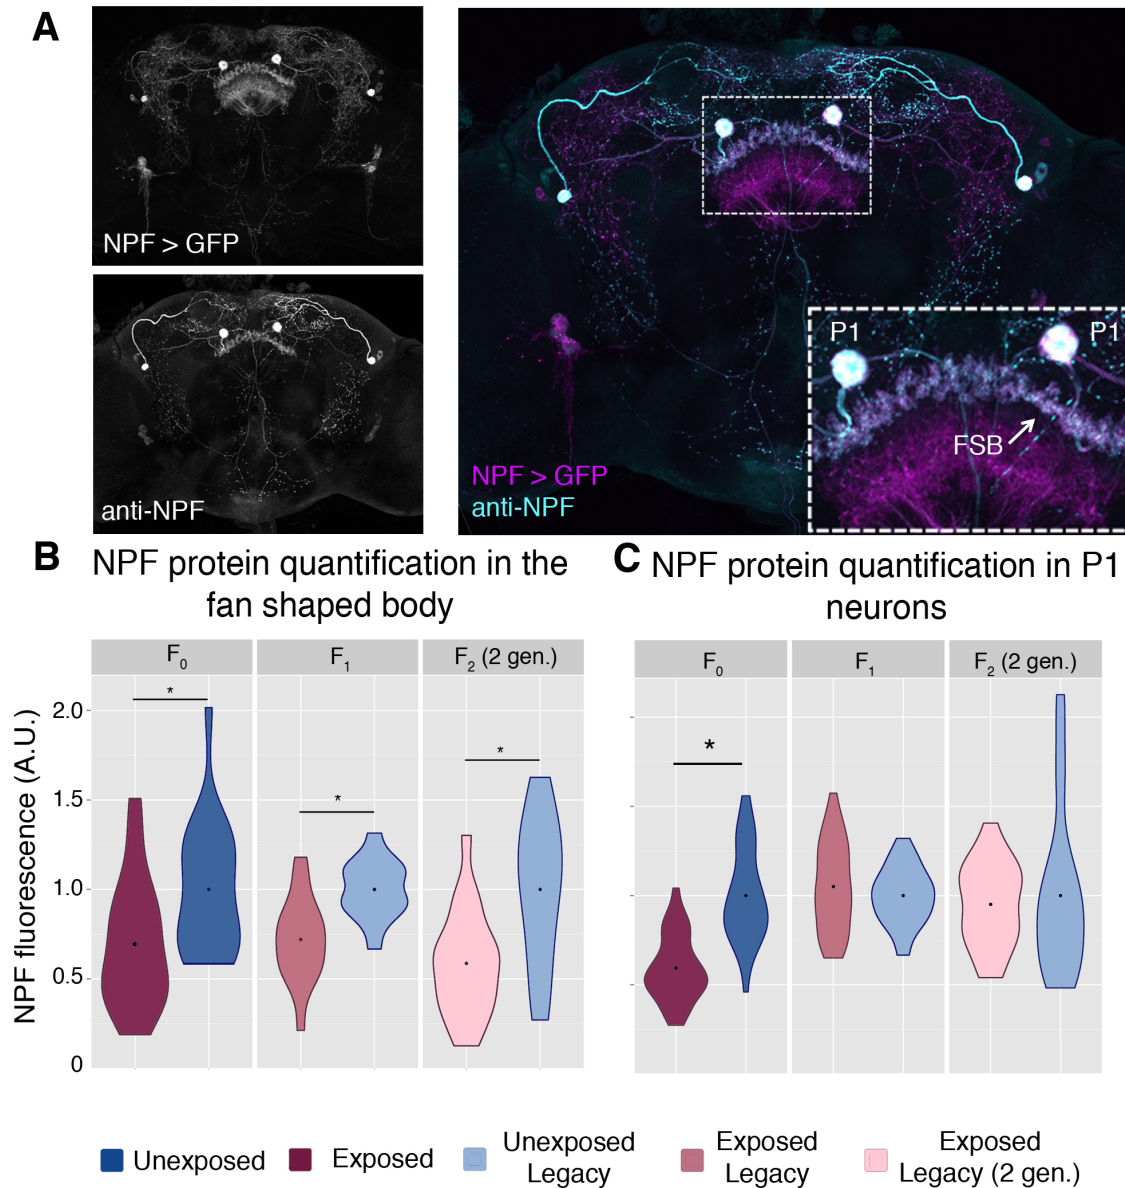

480

481 Figure 4. NPF protein is reduced in the fan shaped body following wasp exposure.

482 NPF antibody staining has a similar pattern to that of NPF-Gal4 expression in an adult female

483 brain, inset shows a magnification of the two large P1 neurons and the fan shaped body

484 (FSB)(A). NPF protein levels are reduced in the fan shaped body across generations (B). NPF

485 depression in P1 neurons is observed only in the F0 generation (C). Points within violin plots

486 denote the group mean. Asterisk indicates a p-value of <0.05.

487

488



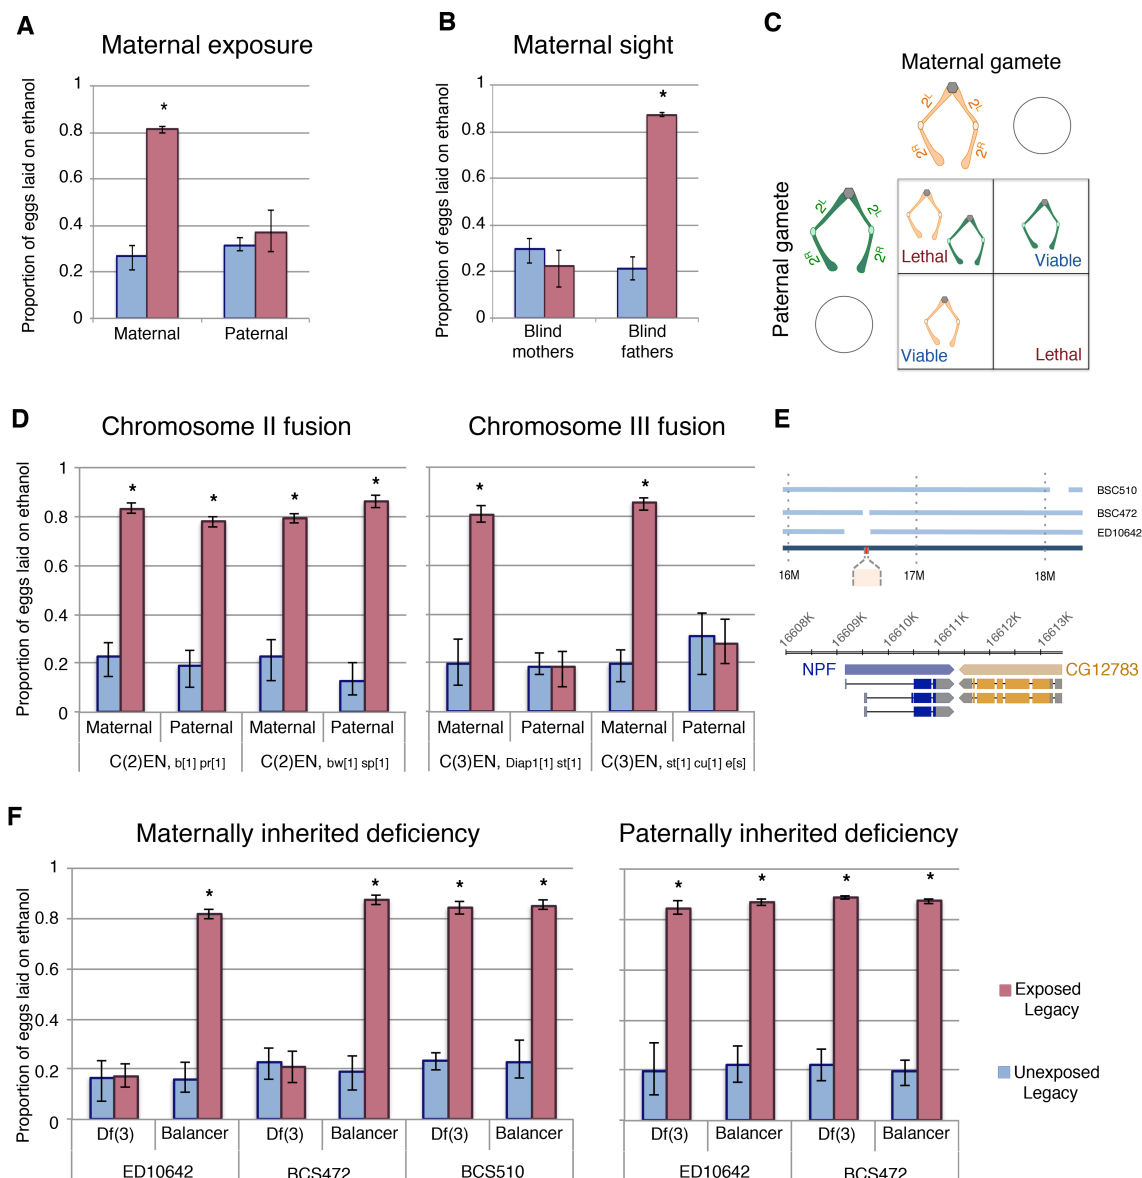

490 **Figure 5. Maternal chromosome 3 is required for inherited ethanol preference.**  
 491 Experiments with exclusively maternal or paternal wasp exposure demonstrate that maternal  
 492 wasp exposure is necessary for ethanol preference inheritance (A). Maternal sight is required for  
 493 ethanol preference inheritance, but paternal sight is dispensable (B). Schematic of compound  
 494 chromosome 2; progeny inherit both copies from either maternal or paternal source (C). Flies  
 495 receiving either maternal or paternal copies of chromosome 2 have inheritance of ethanol  
 496 preference, but compound chromosome 3 must be maternally derived to facilitate inheritance of  
 497 ethanol preference (D). Diagram shows the relative location of NPF (red) on chromosome 3 and  
 498 the deleted region of the deficiency stock (E). Inheritance of ethanol preference was observed in  
 499 flies receiving an intact maternal NPF locus on a balancer chromosome and not in flies from  
 500 receiving a maternal NPF deficiency (Df3) chromosome: Paternal inheritance of the NPF  
 501 deficiency had no effect on transmission of ethanol preference (F). Asterisk indicates a p-value  
 502 of <0.05.  
 503

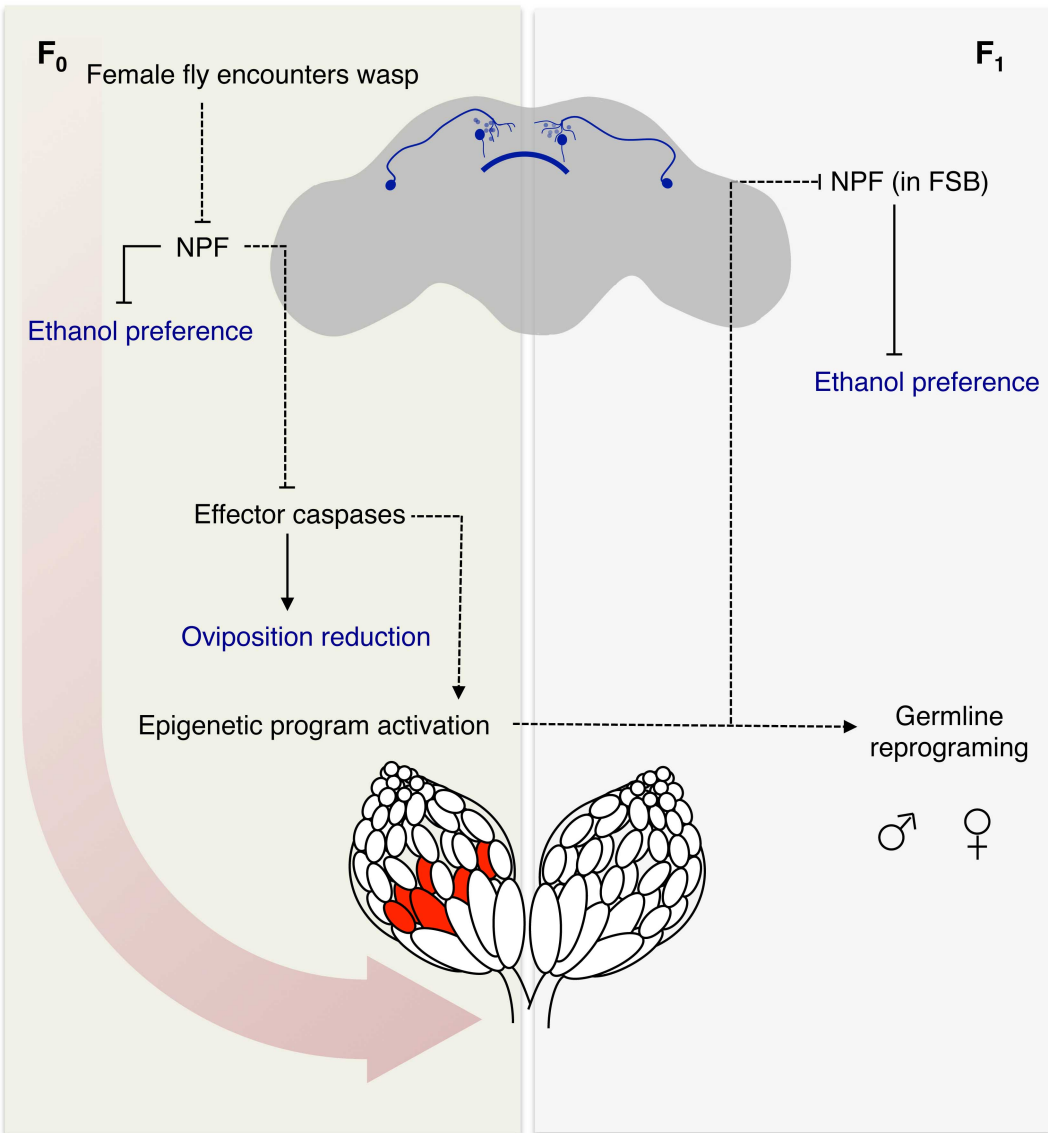

505

506

507 Figure 6. Model for fly-wasp mediated ethanol preference. Wasp encounter leads to a  
508 depression of NPF in the female fly brain. Normally NPF inhibits ethanol preference and  
509 caspase mediated germline apoptosis. The reduction of NPF triggers ethanol preference and  
510 germline caspases. Legacy  $F_1$  female flies inherit depressed NPF in the FSB, both male and  
511 female progeny have altered germline. Measured behavioral outputs are in blue. Dashed lines  
512 indicate a speculative or unknown mechanism of action.

513

514

515 **Supplementary Materials for**  
516  
517 **Transgenerational inheritance of ethanol preference is caused by maternal**  
  
518 **NPF repression.**

519  
520 Julianna Bozler<sup>1</sup>, Balint Z Kacsóh<sup>1</sup>, Giovanni Bosco<sup>1\*</sup>  
521

522 Correspondence to: [Giovanni.Bosco@Dartmouth.edu](mailto:Giovanni.Bosco@Dartmouth.edu)

523  
524  
525  
526  
527  
528  
529  
530  
531  
532  
533  
534

**This file includes:**

Materials and Methods  
Figs. S1 to S4  
Tables S1 to S5

## 535 **Materials and Methods**

536

### 537 Fly husbandry

538 Flies were maintained at room temperature on standard cornmeal-molasses media. A list  
539 of fly lines and genotypes used is reported in Table S5. Female flies were considered  
540 mature adults at three to five days post eclosion. Flies outside of this age range were not  
541 used for experimentation unless specifically noted, as for example in S Fig. 1d.

542 Experiments involving manipulation of the maternal genotype, such as the maternal NPF  
543 knockdown, had a crossing scheme to avoid transgene expression in the F<sub>1</sub> generation.

544 Virgin females with the genotype of interest were crossed to *y,w* males and offspring  
545 were scored by eye color to ensure that flies assayed were not carrying both the Gal4 and  
546 UAS constructs.

547

### 548 Wasp-exposure

549 Mature adult flies were used for wasp exposures: 40 female flies, 10 male flies,  
550 and 20 female Lh14 (*Leptopilina heterotoma*) wasps were placed in a vial with cornmeal-  
551 molasses media. This cohabitation (wasp exposure period) lasted for four days. The  
552 unexposed control consisted of the 40 female flies and 10 male flies with no wasp  
553 cohabitation. Both treatment groups were maintained at room temperature  
554 (approximately 22° C) with a 12 hour light-dark cycle for the duration of the exposure  
555 period.

556 At the conclusion of the exposure period, flies were separated into two cohorts.  
557 Following the removal of all wasps, one group of flies was used to propagate the next  
558 generation, while the second group was assayed for ethanol preference. Group one was

559 placed on molasses-based embryo collection plates, supplemented with yeast paste, for  
560 egg collection. The collection period lasted for 24-hours, at which point the adult flies  
561 were removed. First instar larvae were transferred from these embryo plates to standard  
562 media vials. Larvae were density controlled to approximately 40 larvae per vial.

563 The second group was assayed for ethanol preference using a food-choice assay  
564 (Kacsoh, Bozler, Hodge, Ramaswami, & Bosco, 2015). Briefly, five female flies and  
565 one male fly were placed into a modified petri dish with mesh top, termed the ‘fly corral’.  
566 Two food sources were placed at opposite ends of the ‘fly corral’. Each food source  
567 consisted of 0.45 g of instant drosophila media, hydrated with 2mL liquid. Control food  
568 was hydrated entirely with distilled water, where as ethanol food was prepared with  
569 distilled water and a final addition of 95% ethanol to the top of the prepared food,  
570 creating a food with 6% ethanol by volume. Food sources were removed and replaced  
571 after 24 hours. Figures report the egg laying behavior of the first 24-hour interval unless  
572 otherwise noted. Total number of eggs laid on each food source was counted in a blinded  
573 fashion with treatment unknown to the counter. These egg counts are reported as a  
574 proportion of eggs laid on ethanol food. Flies that encountered ethanol-containing food  
575 were excluded from additional experimentation or lineage propagation. Fly corral  
576 experiments had ten replicates (cages) per condition.

577

#### 578 Transgenerational behavior experiments

579 Legacy flies, those descending from either the unexposed or exposed treatment,  
580 were divided into cohorts as described above for behavioral assay or embryo collection.  
581 These flies were not re-exposed to wasps except in the instance of multigenerational

582 exposure experiments. Two experiments were conducted that involved multiple  
583 generations of treatment. For the successive exposures, three groups of flies were  
584 assayed; exposed legacy (2 generations), exposed legacy (1 generation), and unexposed  
585 legacy. In this instance, the exposed legacy (2 generations) group was generated by  
586 subjecting F<sub>1</sub> exposed legacy flies to an additional round of wasp exposures. These flies  
587 therefore had grandparental and parental wasp exposure. Exposed legacy (1 generation)  
588 had parental wasp exposure only (Figure 3 B). It is important to note that the parents of  
589 the ‘exposed legacy (1 generation)’ flies were F<sub>1</sub> unexposed legacy flies, and therefore  
590 had the same density control and egg collection as the other groups for the  
591 multigenerational duration of the experiment.

592         It is critical to note that baseline ethanol preference is highly variable depending  
593 on environmental conditions. Key factors are temperature and humidity, all ethanol  
594 oviposition assays were conducted in an environmentally controlled room at 25°C,  
595 approximately 30% humidity (+/- 10%) with overhead lighting and a 12-hour light/dark  
596 cycle. Despite these controls, baseline ethanol preference varies day-to-day. For this  
597 reason, all groups for direct comparison (used in statistical tests) were tested at the same  
598 time.

599         Pertaining to the nonconsecutive exposure experiments; again three groups were  
600 assayed, the exposed legacy F<sub>8</sub> (2 generations), exposed legacy (1 generation), and the  
601 unexposed legacy. For these experiments, the exposed legacy F<sub>8</sub> (2 generations) group  
602 was created by subjecting F<sub>7</sub>-exposed legacy flies to an additional round of wasp  
603 exposures. These flies had a six-generation gap between ancestral wasp exposures. Flies

604 in the exposed legacy (1 generation) group were produced by exposing F<sub>7</sub> unexposed  
605 legacy flies to wasps, and collecting the subsequent offspring.

606         Several experiment specific modifications were made to the methods described  
607 above. To parse the maternal and paternal contributions to the inheritance of ethanol  
608 preference two experiments were conducted. First, 40 mated female flies were used for  
609 wasp exposure, in the absence of males. Ten males were added to the population for the  
610 embryo collection period. For paternal contribution, male flies were removed from the  
611 exposure chamber and mated to unexposed virgin females. To test the role of vision in  
612 maternal inheritance, blind female flies mutant in *ninaB*, were crossed to wild type (CS)  
613 males. The reciprocal experiment crossed *ninaB*[1] males to CS female. These  
614 experiments were run in parallel and wasp exposures were performed as previously  
615 described.

616         Compound chromosome experiments crossed two fusion stocks together (either  
617 chromosome-II or chromosome-III). The fusion lines retained phenotypic markers, and  
618 offspring with maternal or paternal chromosomes were sorted accordingly. Deficiency  
619 lines were crossed to CS flies and the genotype of the offspring (balancer or deficiency)  
620 was inferred from phenotypic markers.

621         Particular modifications for the Orb2<sup>AQ</sup> memory-mutant experiments included an  
622 extra day of embryo collection. Following three-days of wasp exposure, flies and wasps  
623 were moved to the embryo collection chamber for the final treatment day. Eggs were  
624 collected for 24-hours in the presence of the 20 female Lh14 wasps. At the end of this  
625 period, wasps were removed and a new embryo collection plate was introduced for the  
626 second day of embryo collections. This second day of collection corresponds to the

627 standard embryo collection timeframe in the above-described experiments. F<sub>1</sub> flies had  
628 the same genotype as the parental line.

629 Sibling cohorts were collected to assess the longevity of the germline change.  
630 ‘Brood 1’ flies were collected in the 24-hours immediately following the removal of the  
631 wasps. ‘Brood 2’ flies were collected from the same parents, 10 days after the  
632 termination of the wasp exposure.

633 Finally, diet restriction experiments had two groups one with high protein and the  
634 other low protein diets. Low protein flies were maintained on molasses based embryo  
635 plates. The high protein group was maintained in similar fashion, but with the addition of  
636 yeast paste. High/low diet was maintained for four days prior to embryo collection.

637

#### 638 Apoptosis quantification

639 Following the treatment period, ovaries were dissected and fixed in 4%  
640 formaldehyde for 30 minutes. Samples were stained with DAPI and apoptosis was  
641 scored based on the morphology of the nurse cell DNA. A researcher blinded to the  
642 genotype and treatment group of the samples performed the scoring. At a minimum, 15  
643 ovaries were scored across 3 replicates (independent wasp exposures) for each group.

644

#### 645 Immunostaining and microscopy

646 Antibody to neuropeptide F was generated in a rabbit to the full length NPF  
647 peptide: C-Ahx-SNSRPPRKNDVNTMADAYKFLQDLDTYYGDRARVRFamide. The  
648 antibody was subsequently purified using a truncated peptide containing the first 28  
649 amino acids of NPF. Following purification, the antibody was depleted using a peptide



650 of the eight amino acid C-terminal tail, shared by many neuropeptides. All peptide  
651 synthesis, antigen injection, serum preparation and peptide purification and depletions  
652 were performed by 21<sup>st</sup> Century Biochemicals.

653 Whole flies were fixed in 4% formaldehyde overnight at 4° C. Female brains  
654 were dissected, blocked, and incubated with anti-NPF (1:1000) overnight at 4° C.  
655 Antibody solution was removed and samples were blocked before the addition of the  
656 secondary antibody, anti-rabbit 488 (1:200), at room temperature for two-hours. Samples  
657 were counter stained with DAPI.

658 For NPF quantification, flies expressing a RFP tagged histone were dissected  
659 along with treatment groups and stained in the same solution. Pixel intensity of the fan  
660 shaped body (FSB) was measured in Image J. The FSB was outlined by hand and  
661 intensity measured. A background measure was made of the region immediately ventral  
662 to the FSB, with the same total area as the outlined FSB. The background value was  
663 subtracted from FSB measurement. Finally, the background-adjusted intensity value for  
664 each brain was divided by the arc length of its' FSB. This process was repeated for each  
665 treatment group and the corresponding histone-RFP flies. These values were normalized  
666 to the histone-RFP flies to serve as a control for batch specific variation in staining. Each  
667 treatment group was normalized to the unexposed average of that replicate using the  
668 formula(s):

$$669 \text{ Fluorescence} = (\text{FSB}_{\text{intensity}} - \text{background}_{\text{intensity}}) / \text{FSB}_{\text{length}}$$

$$670 \text{ BatchNormalized} = (\text{Fluorescence}_{\text{CantonS}} / \text{Fluorescence}_{[\text{avg}]_{\text{his-RFP}}})$$

$$671 \text{ AFU} = \text{BatchNormalized}_{\text{exposed}} / \text{BatchNormalized}_{[\text{avg}]_{\text{unexposed}}}$$

672

673 Standard fluorescent images were visualized with the Nikon Eclipse E800  
674 microscope and the Olympus DP71 camera. For each experiment, wasp exposure and  
675 staining were performed on two separate occasions and final data was pooled after  
676 checking for the absence of a batch effect. A minimum of 10 brains were dissected for  
677 each treatment replicate as well as RFP-histone co-staining brains. Final quantified  
678 sample size range from 15 to 20 (normalized brains), due to sample loss or damage.  
679 Imaged samples were only excluded if clear damage or trauma (from dissection or  
680 staining process) was evident in the region of interest (FSB or P1 neurons).

681

#### 682 RNA quantification

683 Mature female flies were anesthetized with CO<sub>2</sub> and collected in 15 mL conical tubes,  
684 either immediately following the treatment period (F<sub>0</sub>), or 3-5 days post eclosion (F<sub>1</sub>-F<sub>2</sub>).  
685 Flies were frozen in liquid nitrogen and briefly vortexed to separate whole heads.  
686 Approximately 100 heads were collected for each replicate. A miRNeasy Kit (Qiagen)  
687 with on-column DNase treatment was used for RNA isolation. Four samples of each  
688 treatment group were prepared.

689 RNA samples were depleted of rRNA followed by random priming. Minimum  
690 sequencing depth per sample was 40 million paired-end reads on the Illumina platform.  
691 Sequencing reads were indexed to transcripts using Kallisto and the Ensembl genome  
692 (BDGP6) with 100 bootstraps (Aken et al., 2016; Bray, Pimentel, Melsted, & Pachter,  
693 2016). Downstream processing and statistical analyses used Sleuth (Pimentel, Bray,  
694 Puente, Melsted, & Pachter, 2017). Heat maps were generated using hierarchical  
695 clustering and the R package pheatmap.

696 NPF transcript was measured by qPCR (SYBR Green, Thermo-Fisher 4309155).  
697 NPF primer targeted mRNA (TCCTGGTTGCCTGTGTGG,  
698 TCAGCCATAGTGTGACATCG). Actin served as the control gene  
699 (CGCAAGGATCTGTATGCCAA, ACGGAGTACTTGCGCTCTGG). Fold change was  
700 calculated using the delta-delta Ct method.

701

## 702 Statistics

703 Statistical tests were run in R (3.0.2 version, 'Frisbee Sailing'). P-values for egg count  
704 data, NPF staining, and apoptosis quantification, were produced by applying a Mann-  
705 Whitney Rank Sum test. Error bars presented in the egg count ethanol preference graphs  
706 are bootstrap confidence intervals, generated using the boot package.

707

708

709

710

711

712

713

714

715

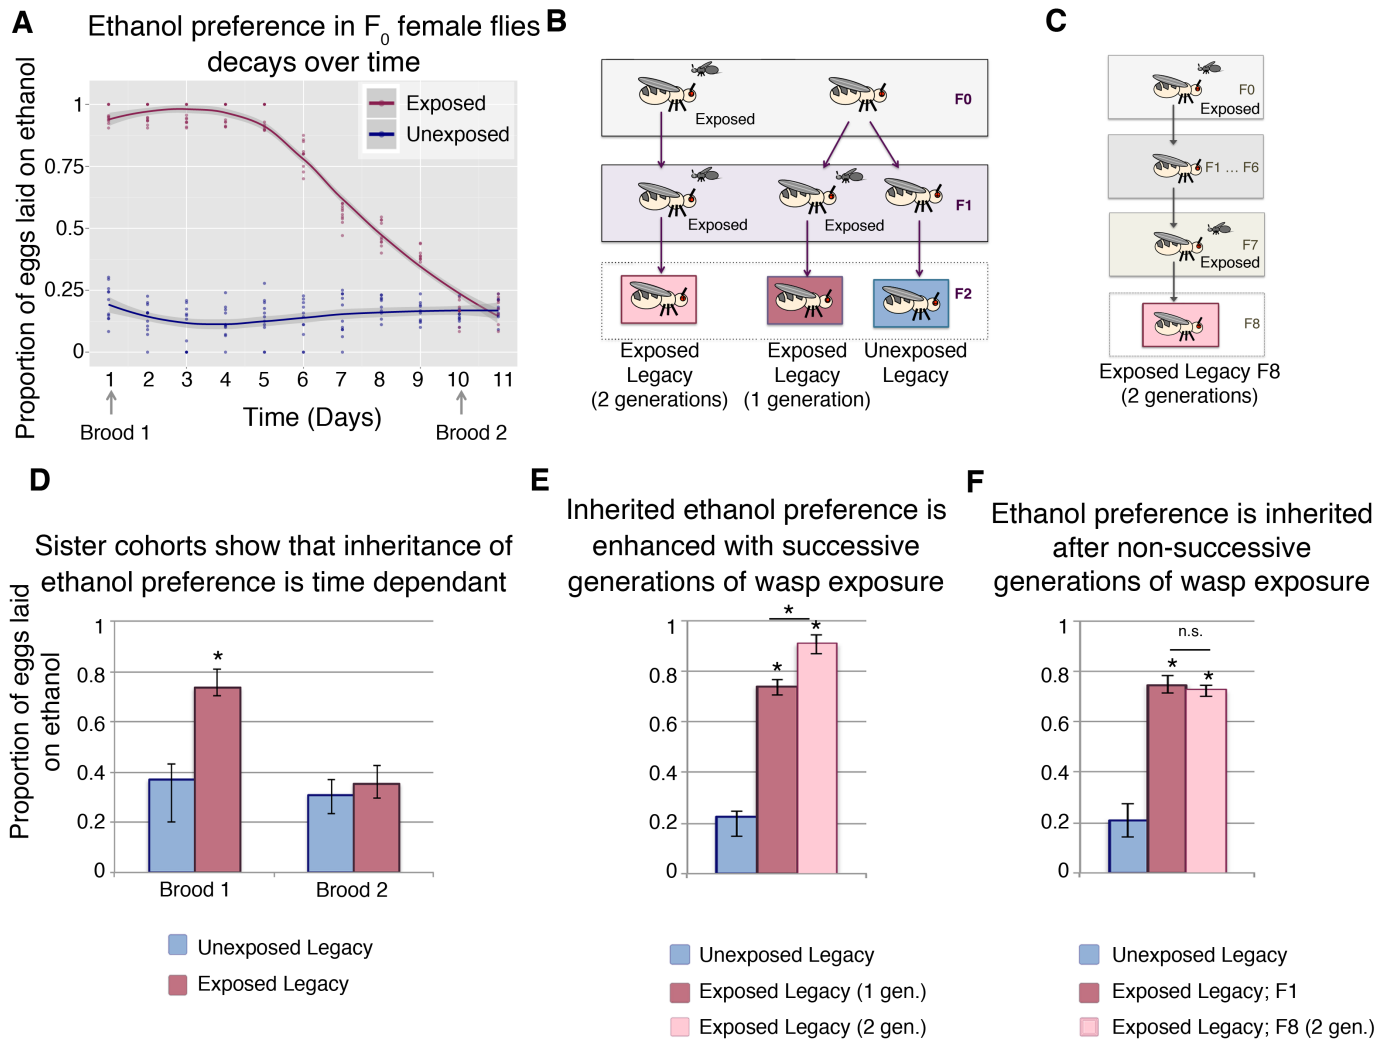

717

718 **Figure S1. Temporal dynamics of wasp exposure effect inheritance of ethanol preference.**

719 Ethanol preference decays following wasp exposure (in  $F_0$  flies), with loess regression, shaded

720 region indicates standard error (A). Diagram of multigenerational exposure is shown for

721 successive generations (B), and non-consecutive generations (C). Quantification of ethanol

722 preference from sister cohorts collected at different intervals post-wasp exposure (D). Flies with

723 successive generations of wasp exposure have enhanced ethanol preference (E). Alternatively,

724 flies from a second generation of non-consecutive wasp exposure (exposure of  $F_7$  flies) exhibit

725 an ethanol preference similar to that of one-generation wasp exposed flies (F). Asterisk indicates

726 a p-value of  $<0.05$ .

727

728

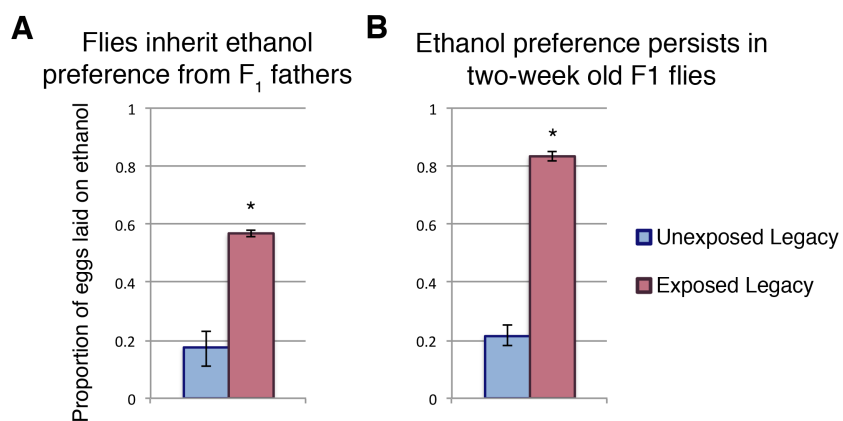

729

730 **Figure S2.**  $F_1$  ethanol preference has distinct characteristics from those of the parental  $F_0$   
731 generation. Male  $F_1$  flies are able to pass on ethanol preference to their offspring (**A**). Ethanol  
732 preference of  $F_1$  flies has not decayed two-weeks post eclosion (**B**). Asterisk indicates a p-value  
733 of <0.05.  
734

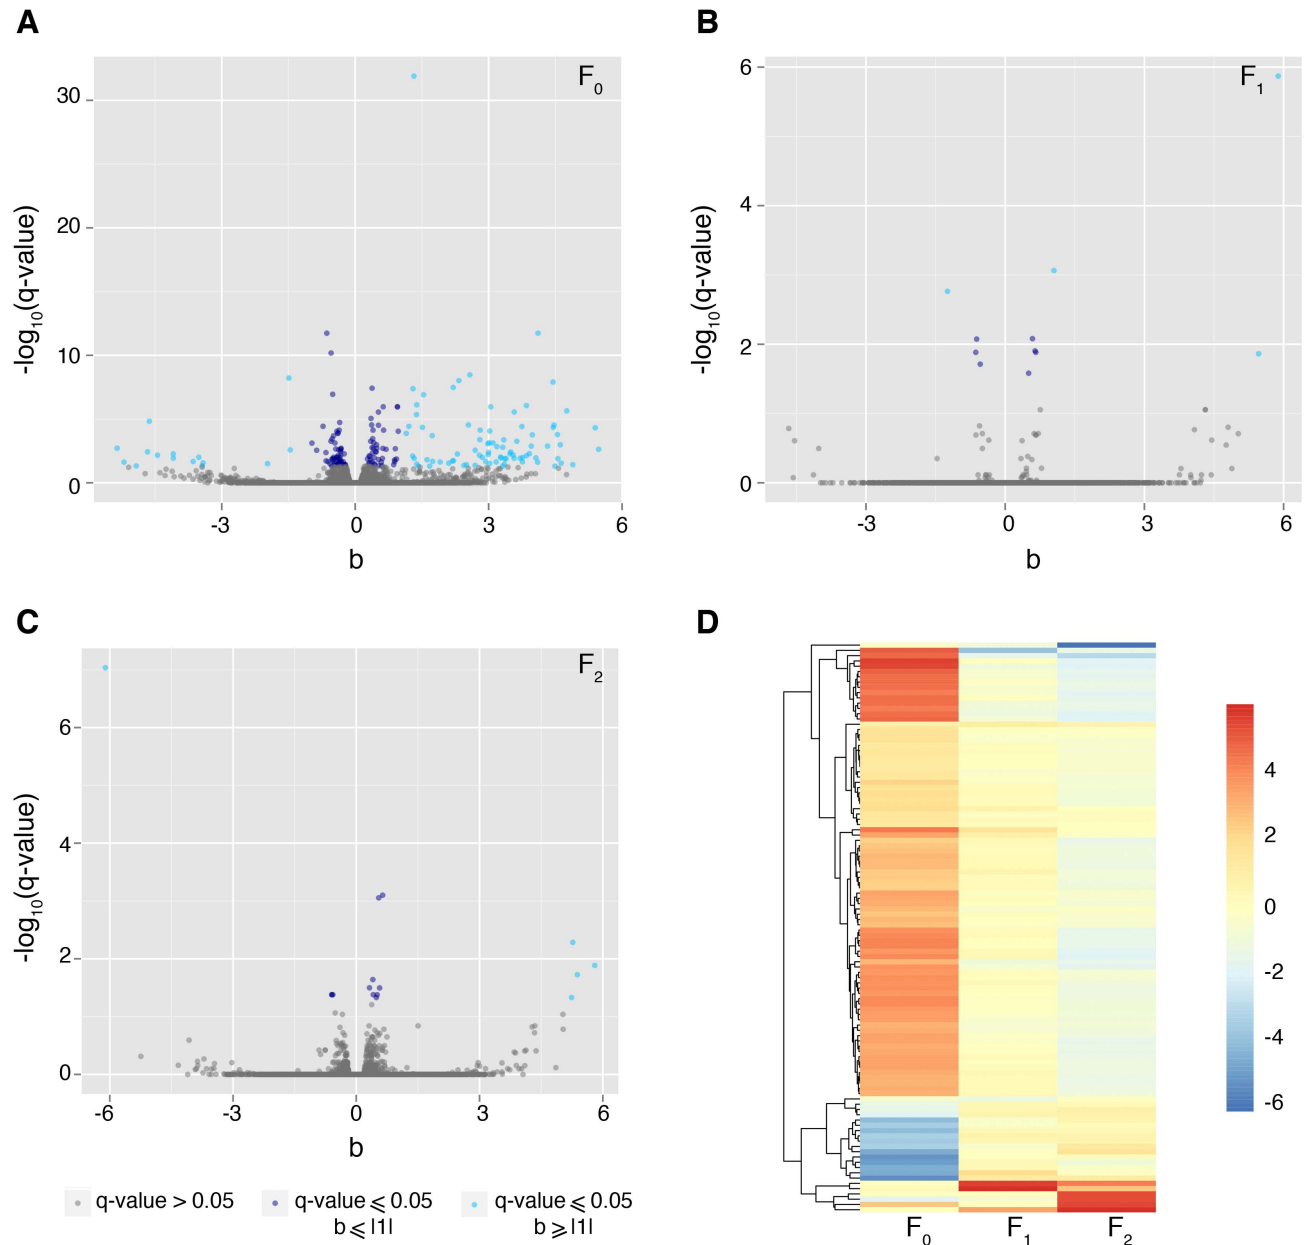

736 **Figure S3. Global transcriptional changes in the female head.** RNA sequencing was  
737 performed on heads of  $F_0$ ,  $F_1$ , and  $F_2$  females. Volcano plots show the distribution of  
738 transcript expression and significance.  $F_0$  flies have a considerable number of  
739 differentially expressed transcripts (**A**). Whereas  $F_1$  and  $F_2$  heads have very few changes  
740 in transcripts (**B**) & (**C**). The beta value is approximately analogous to the natural log  
741 fold change of the transcript, and the q-value is the measure of significance. Grey points  
742 indicate a transcript with non-significant q-value, dark blue points indicate transcripts  
743 with significant q-value but that do not meet the beta value threshold. Light blue dots  
744 have significant q-value and an absolute value of beta greater or equal to one. Heat map  
745 shows the trend of transcript expression over the three generations (**D**). Transcript  
746 meeting the threshold criteria (q-value and beta) for any one generation was included in  
747 the map.

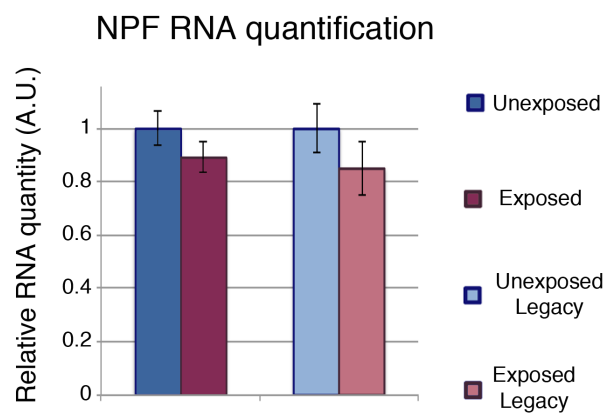

748  
749

750 **Figure S4.** mRNA quantification of NPF in female fly heads. Asterisk indicates a p-  
751 value of <0.05.

752

753 **Table S1.** Statistical tests and p-values relating to main text figures.

| Figure | Comparison groups                                        | p-value   | statistical test      |
|--------|----------------------------------------------------------|-----------|-----------------------|
| 1B     | F0 (Exposed vs unexposed)                                | 1.08E-05  | Mann-Whitney Rank Sum |
| 1B     | F1 (Exposed vs unexposed)                                | 8.64E-07  | Mann-Whitney Rank Sum |
| 1B     | F2 (Exposed vs unexposed)                                | 2.58E-08  | Mann-Whitney Rank Sum |
| 1B     | F3 (Exposed vs unexposed)                                | 1.29E-08  | Mann-Whitney Rank Sum |
| 1B     | F4 (Exposed vs unexposed)                                | 4.13E-06  | Mann-Whitney Rank Sum |
| 1B     | F5 (Exposed vs unexposed)                                | 0.00833   | Mann-Whitney Rank Sum |
| 1B     | F6 (Exposed vs unexposed)                                | 0.6063    | Mann-Whitney Rank Sum |
| 1C     | CS-during (Exposed vs unexposed)                         | 0.0001817 | Mann-Whitney Rank Sum |
| 1C     | Orb2-during (Exposed vs unexposed)                       | 0.000278  | Mann-Whitney Rank Sum |
| 1C     | CS-post (Exposed vs unexposed)                           | 1.08E-05  | Mann-Whitney Rank Sum |
| 1C     | Orb2-post (Exposed vs unexposed)                         | 0.02065   | Mann-Whitney Rank Sum |
| 2A     | F0 (Exposed vs unexposed)                                | 0.0001593 | Mann-Whitney Rank Sum |
| 2A     | F1 (Exposed vs unexposed)                                | 0.3144    | Mann-Whitney Rank Sum |
| 2B     | High protein vs low protein                              | 0.0001079 | Mann-Whitney Rank Sum |
| 2C     | Drice[RNAi] (Exposed vs unexposed)                       | 0.5787    | Mann-Whitney Rank Sum |
| 2C     | Dcp-1[RNAi] (Exposed vs unexposed)                       | 0.05889   | Mann-Whitney Rank Sum |
| 2D     | High protein vs low protein                              | 0.933864  | Mann-Whitney Rank Sum |
| 3A     | NPF OE (Exposed vs unexposed)                            | 0.5787    | Mann-Whitney Rank Sum |
| 3A     | NPF KD vs NPF-Gal4                                       | 1.08E-05  | Mann-Whitney Rank Sum |
| 3B     | NPF OE (Exposed vs unexposed)                            | 0.1758    | Mann-Whitney Rank Sum |
| 3B     | NPF KD vs NPF-Gal4                                       | 1.76E-05  | Mann-Whitney Rank Sum |
| 3C     | Elav-Gal4 (Exposed vs unexposed)                         | 0.0001697 | Mann-Whitney Rank Sum |
| 3C     | NPFR[RNAi] (Exposed vs unexposed)                        | 3.07E-06  | Mann-Whitney Rank Sum |
| 3C     | NPFR KD (Exposed vs unexposed)                           | 0.0007069 | Mann-Whitney Rank Sum |
| 3C     | NPFR KD vs NPFR[RNAi] unexposed                          | 0.0001503 | Mann-Whitney Rank Sum |
| 3C     | NPFR KD vs Elav-Gal4 unexposed                           | 0.0006232 | Mann-Whitney Rank Sum |
| 3D     | NPF OE (Exposed vs unexposed)                            | 0.4359    | Mann-Whitney Rank Sum |
| 3D     | NPF KD (Exposed vs unexposed)                            | 1.08E-05  | Mann-Whitney Rank Sum |
| 3D     | NPF-Gal4 (Exposed vs unexposed)                          | 1.08E-05  | Mann-Whitney Rank Sum |
| 3D     | NPF KD vs NPF-Gal4 unexposed                             | 1.08E-05  | Mann-Whitney Rank Sum |
| 3E     | Elav-Gal4 (Exposed vs unexposed)                         | 0.0001817 | Mann-Whitney Rank Sum |
| 3E     | NPFR[RNAi] (Exposed vs unexposed)                        | 0.0001817 | Mann-Whitney Rank Sum |
| 3E     | NPFR KD (Exposed vs unexposed)                           | 0.0001817 | Mann-Whitney Rank Sum |
| 3E     | NPFR KD vs NPFR[RNAi] unexposed                          | 1.08E-05  | Mann-Whitney Rank Sum |
| 3E     | NPFR KD vs Elav-Gal4 unexposed                           | 0.0001817 | Mann-Whitney Rank Sum |
| 3F     | NPF OE (Exposed vs unexposed)                            | 0.7333    | Mann-Whitney Rank Sum |
| 4B     | F0 (Exposed vs unexposed)                                | 0.009027  | Mann-Whitney Rank Sum |
| 4B     | F1 (Exposed vs unexposed)                                | 0.0004949 | Mann-Whitney Rank Sum |
| 4B     | F2 (Exposed vs unexposed)                                | 0.002572  | Mann-Whitney Rank Sum |
| 4C     | F0 (Exposed vs unexposed)                                | 3.09E-11  | Mann-Whitney Rank Sum |
| 4C     | F1 (Exposed vs unexposed)                                | 0.3972    | Mann-Whitney Rank Sum |
| 4C     | F2 (Exposed vs unexposed)                                | 0.6378    | Mann-Whitney Rank Sum |
| 5A     | maternal (Exposed vs unexposed)                          | 0.000011  | Mann-Whitney Rank Sum |
| 5A     | paternal (Exposed vs unexposed)                          | 0.1904    | Mann-Whitney Rank Sum |
| 5B     | Blind mothers (Exposed vs unexposed)                     | 0.3154    | Mann-Whitney Rank Sum |
| 5B     | Blind fathers (Exposed vs unexposed)                     | 0.0002712 | Mann-Whitney Rank Sum |
| 5D     | Chr-II Maternal C(2)EN b[1] pr[1] (Exposed vs unexposed) | 0.0001796 | Mann-Whitney Rank Sum |
| 5D     | Chr-II Paternal C(2)EN b[1] pr[1] (Exposed vs unexposed) | 0.0002695 | Mann-Whitney Rank Sum |



|     |                                                                 |           |                       |
|-----|-----------------------------------------------------------------|-----------|-----------------------|
| 5D  | Chr-II Maternal C(2)EN bw[1] sp[1] (Exposed vs unexpo           | 0.0004456 | Mann-Whitney Rank Sum |
| 5D  | Chr-II Paternal C(2)EN bw[1] sp[1] (Exposed vs unexpo           | 0.0002695 | Mann-Whitney Rank Sum |
| 5D  | Chr-III Maternal C(3)EN Diap1[1] sp[1] (Exposed vs unexposed)   | 0.0006306 | Mann-Whitney Rank Sum |
| 5D  | Chr-III Paternal C(3)EN Diap1[1] sp[1] (Exposed vs unexposed)   | 0.7308    | Mann-Whitney Rank Sum |
| 5D  | Chr-III Maternal C(3)EN st[1] cu[1] e[s] (Exposed vs unexposed) | 0.0006258 | Mann-Whitney Rank Sum |
| 5D  | Chr-III Paternal C(3)EN st[1] cu[1] e[s](Exposed vs unex        | 0.8857    | Mann-Whitney Rank Sum |
| 5F  | Maternal Df(3)ED10642 (Exposed vs unexposed)                    | 0.8796    | Mann-Whitney Rank Sum |
| 5F  | Maternal ED10642-balancer (Exposed vs unexposed)                | 0.0001766 | Mann-Whitney Rank Sum |
| 5F  | Maternal Df(3)BCS472 (Exposed vs unexposed)                     | 0.7569    | Mann-Whitney Rank Sum |
| 5F  | Maternal BCS472-balancer (Exposed vs unexposed)                 | 0.000278  | Mann-Whitney Rank Sum |
| 5F  | Maternal Df(3)BCS510 (Exposed vs unexposed)                     | 0.002141  | Mann-Whitney Rank Sum |
| 5F  | Maternal BCS510-balancer (Exposed vs unexposed)                 | 0.002141  | Mann-Whitney Rank Sum |
| 5F  | Paternal Df(3)ED10642 (Exposed vs unexposed)                    | 0.0001756 | Mann-Whitney Rank Sum |
| 5F  | Paternal ED10642-balancer (Exposed vs unexposed)                | 0.0001796 | Mann-Whitney Rank Sum |
| 5F  | Paternal Df(3)BCS472 (Exposed vs unexposed)                     | 0.0004426 | Mann-Whitney Rank Sum |
| 5F  | Paternal BCS472-balancer (Exposed vs unexposed)                 | 0.0002451 | Mann-Whitney Rank Sum |
| S1D | Brood 1 (Exposed vs unexposed)                                  | 2.49E-10  | Mann-Whitney Rank Sum |
| S1D | Brood 2 (Exposed vs unexposed)                                  | 0.6305    | Mann-Whitney Rank Sum |
| S1E | Exposed (1 gen) vs unexposed                                    | 1.08E-05  | Mann-Whitney Rank Sum |
| S1E | Exposed (2 gen) vs unexposed                                    | 1.08E-05  | Mann-Whitney Rank Sum |
| S1E | Exposed (1 gen) vs exposed (2 gen)                              | 1.08E-05  | Mann-Whitney Rank Sum |
| S1F | Exposed (1 gen) vs unexposed                                    | 1.82E-04  | Mann-Whitney Rank Sum |
| S1F | Exposed F8 (2 gen) vs unexposed                                 | 1.08E-05  | Mann-Whitney Rank Sum |
| S1F | Exposed (1 gen) vs exposed F8 (2 gen)                           | 0.472     | Mann-Whitney Rank Sum |
| S2A | Exposed vs unexposed                                            | 1.08E-05  | Mann-Whitney Rank Sum |
| S2B | Exposed vs unexposed                                            | 0.000181  | Mann-Whitney Rank Sum |
| S4  | F0 (Exposed vs unexposed)                                       | 0.3429    | Mann-Whitney Rank Sum |
| S4  | F1 (Exposed vs unexposed)                                       | 0.3429    | Mann-Whitney Rank Sum |

754

755

756

757 **Table S2.** Oregon R experimental data. Key experiments were replicated using the additional  
 758 wild-type strain OreR. “Corresponding Figure” indicates the experiment that was replicated: A  
 759 listing of Fig1B therefore indicates that the experimental conditions for Figure 1B were  
 760 duplicated using OreR flies.

| Corresponding Figure for Duplicate Experiment | Description                           | Day 1               |                |          | Day 2               |                |          |
|-----------------------------------------------|---------------------------------------|---------------------|----------------|----------|---------------------|----------------|----------|
|                                               |                                       | Mean (experimental) | Mean (control) | p-value  | Mean (experimental) | Mean (control) | p-value  |
| 1B                                            | F0                                    | 0.913               | 0.288          | 1.08E-05 | 0.927               | 0.276          | 1.08E-05 |
| 1B                                            | F1                                    | 0.704               | 0.303          | 1.08E-05 | 0.695               | 0.276          | 1.81E-04 |
| 1B                                            | F2                                    | 0.679               | 0.286          | 1.08E-05 | 0.691               | 0.271          | 1.82E-04 |
| 1B                                            | F3                                    | 0.675               | 0.25           | 1.08E-05 | 0.647               | 0.266          | 1.82E-04 |
| 1B                                            | F4                                    | 0.556               | 0.211          | 2.44E-04 | 0.534               | 0.221          | 1.08E-05 |
| 1B                                            | F5                                    | 0.366               | 0.277          | 0.07526  | 0.41                | 0.221          | 0.000129 |
| 1B                                            | F6                                    | 0.273               | 0.263          | 0.7394   | 0.224               | 0.238          | 0.6305   |
| Not shown in figure                           | F7                                    | 0.202               | 0.208          | 0.4359   | 0.211               | 0.193          | 0.3429   |
| 2A                                            | F0 apoptosis (Exposed vs unexposed)   | 0.705               | 1.70E-02       | 0.000144 |                     |                |          |
| 2A                                            | F1 apoptosis (Exposed vs unexposed)   | 0.017               | 3.10E-02       | 0.2931   |                     |                |          |
| 5A                                            | Paternal                              | 0.36                | 0.45           | 0.1655   | 0.34                | 0.35           | 0.8534   |
| S1D                                           | Brood 2                               | 0.23                | 0.27           | 0.705    | 0.24                | 0.27           | 0.6842   |
| S1E                                           | Exposed (1 gen) vs unexposed          | 0.744               | 0.213          | 1.81E-04 | 0.723               | 0.186          | 1.82E-04 |
| S1E                                           | Exposed (2 gen) vs unexposed          | 0.91                | -              | 1.08E-05 | 0.924               | -              | 1.82E-04 |
| S1E                                           | Exposed (1 gen) vs exposed (2 gen)    | -                   | -              | 1.81E-04 | -                   | -              | 1.81E-04 |
| S1F                                           | Exposed (1 gen) vs unexposed          | 0.79                | 0.258          | 1.82E-04 | 0.81                | 0.223          | 1.82E-04 |
| S1F                                           | Exposed F8 (2 gen) vs unexposed       | 0.76                | -              | 1.82E-04 | 0.792               | -              | 1.80E-04 |
| S1F                                           | Exposed (1 gen) vs exposed F8 (2 gen) | -                   | -              | 0.1209   | -                   | -              | 0.7048   |

761

762

763 **Table S3.** Canton S day-2 data; mean(s) and p-value(s).

764

| Corresponding Figure | Description                          | Mean (experimental) | Mean (control) | p-value  |
|----------------------|--------------------------------------|---------------------|----------------|----------|
| 1B                   | F0                                   | 0.959               | 0.201          | 2.71E-04 |
| 1B                   | F1                                   | 0.8                 | 0.369          | 3.38E-06 |
| 1B                   | F2                                   | 0.689               | 0.349          | 1.29E-08 |
| 1B                   | F3                                   | 0.595               | 0.258          | 6.12E-06 |
| 1B                   | F4                                   | 0.523               | 0.262          | 2.58E-08 |
| 1B                   | F5                                   | 0.431               | 0.267          | 0.01256  |
| 1B                   | F6                                   | 0.237               | 0.264          | 0.1577   |
| Not shown in figure  | F7                                   | 0.158               | 0.163          | 0.7674   |
| 2C                   | Drice[RNAi]                          | 0.295               | 0.291          | 0.6774   |
| 2C                   | Dcp-1[RNAi]                          | 0.329               | 0.261          | 0.4359   |
| 2D                   | Low protein v high (control)         | 0.163               | 0.173          | 0.575213 |
| 5A                   | maternal                             | 0.754               | 0.244          | 0.000182 |
| 5A                   | paternal                             | 0.425               | 0.29           | 0.001031 |
| S1D                  | Brood 1                              | 0.81                | 0.335          | 3.12E-08 |
| S1D                  | Brood 2                              | 0.33                | 0.273          | 0.1903   |
| S1E                  | Exposed (1 gen) v Unexposed          | 0.769               | 0.164          | 1.08E-05 |
| S1E                  | Exposed (2 gen) v Exposed (1 gen)    | 0.908               | -              | 1.82E-04 |
| S1E                  | Exposed (2 gen) v Unexposed          | -                   | -              | 1.82E-04 |
| S1F                  | Exposed (1 gen) v Unexposed          | 0.737               | 0.172          | 1.82E-04 |
| S1F                  | Exposed F8 (2 gen) v Exposed (1 gen) | 0.784               | -              | 0.08873  |
| S1F                  | Exposed F8 (2 gen) v Unexposed       | -                   | -              | 1.82E-04 |
| S2A                  | paternal (F1)                        | 0.569               | 194            | 1.08E-05 |
| S2B                  | Two-week old F1                      | 0.833               | 0.127          | 0.000022 |

765

766

767 **Table S4.** RNA sequencing results from female fly heads.

| Transcript ID | Gene Name | q-value     | b            | Data set |
|---------------|-----------|-------------|--------------|----------|
| FBtr0332131   | CG42255   | 1.25E-32    | 1.320266165  | F0       |
| FBtr0087004   | Amy-p     | 1.84E-12    | 4.110027459  | F0       |
| FBtr0086983   | Amy-d     | 3.40E-09    | 2.577135928  | F0       |
| FBtr0077220   | lcs       | 6.05E-09    | -1.490020237 | F0       |
| FBtr0074375   | CG15865   | 9.56E-09    | 2.330606904  | F0       |
| FBtr0302527   | CG33346   | 1.25E-08    | 4.447797727  | F0       |
| FBtr0079607   | Mur29B    | 3.32E-08    | 2.203753518  | F0       |
| FBtr0083372   | CG8907    | 4.13E-08    | 1.300100455  | F0       |
| FBtr0079136   | CG11029   | 1.23E-07    | 1.536917077  | F0       |
| FBtr0078953   | Skp2      | 7.62E-07    | 1.383516598  | F0       |
| FBtr0076063   | Muc68E    | 8.69E-07    | 3.848174764  | F0       |
| FBtr0085472   | CG7567    | 1.09E-06    | 3.047754006  | F0       |
| FBtr0074626   | CG15043   | 2.25E-06    | 4.756372803  | F0       |
| FBtr0083164   | CG5399    | 2.78E-06    | 3.575384524  | F0       |
| FBtr0088432   | Def       | 4.45E-06    | 1.378119365  | F0       |
| FBtr0310455   | CG43680   | 1.48E-05    | -4.62766656  | F0       |
| FBtr0083823   | CG4783    | 2.91E-05    | 2.545384042  | F0       |
| FBtr0300506   | CG42397   | 2.91E-05    | 4.470662763  | F0       |
| FBtr0083030   | Mf        | 3.72E-05    | 1.206382413  | F0       |
| FBtr0087792   | CG13321   | 3.85E-05    | 3.747204916  | F0       |
| FBtr0083026   | CG3987    | 4.51E-05    | 1.512498647  | F0       |
| FBtr0087797   | CG13323   | 4.51E-05    | 4.453581565  | F0       |
| FBtr0345521   | Amy-p     | 4.80E-05    | 5.396352897  | F0       |
| FBtr0308229   | CG13810   | 7.37E-05    | 2.80924618   | F0       |
| FBtr0310431   | CG32633   | 8.70E-05    | 3.026437806  | F0       |
| FBtr0306289   | CG43236   | 0.000133305 | 1.148856362  | F0       |
| FBtr0087796   | CG13324   | 0.000164657 | 4.546214478  | F0       |
| FBtr0075069   | CG6839    | 0.00017266  | 3.983281993  | F0       |
| FBtr0079500   | Acp1      | 0.000202054 | 1.732372175  | F0       |
| FBtr0100028   | obst-H    | 0.000407687 | 2.801483865  | F0       |
| FBtr0072879   | CG13806   | 0.000427043 | 3.340054966  | F0       |
| FBtr0084957   | Kaz-m1    | 0.000550781 | 3.632660457  | F0       |
| FBtr0076119   | Muc68D    | 0.000716285 | 3.009816876  | F0       |
| FBtr0072121   | CG3906    | 0.000755348 | 3.097285784  | F0       |
| FBtr0078908   | CG14645   | 0.000861022 | 2.982720707  | F0       |
| FBtr0088161   | alphaTry  | 0.001040886 | 4.610885525  | F0       |
| FBtr0072938   | CG1246    | 0.001327451 | 4.323284994  | F0       |
| FBtr0302854   | Phae2     | 0.001328434 | 3.958342039  | F0       |
| FBtr0080370   | Oatp33Eb  | 0.001447556 | 3.186358438  | F0       |
| FBtr0081865   | CG11672   | 0.001634501 | 3.317037455  | F0       |
| FBtr0346383   | whe       | 0.001932977 | -5.350102624 | F0       |
| FBtr0076044   | CG14125   | 0.002352177 | 5.47281471   | F0       |
| FBtr0082900   | CG33109   | 0.002647488 | -1.460634359 | F0       |
| FBtr0112526   | CG34324   | 0.002778253 | 2.696535128  | F0       |
| FBtr0306805   | CG9626    | 0.003698463 | -4.667810078 | F0       |
| FBtr0290275   | tgy       | 0.00374776  | 3.498024408  | F0       |
| FBtr0114524   | Pgant4    | 0.004076224 | 2.997652431  | F0       |
| FBtr0303096   | Scsalpha  | 1.35E-06    | 5.882649017  | F1       |
| FBtr0083763   | CG31221   | 0.000862597 | 1.050809868  | F1       |
| FBtr0100880   | mt:ND4L   | 0.001724056 | -1.24427752  | F1       |

|             |        |             |              |    |
|-------------|--------|-------------|--------------|----|
| FBtr0077465 | ed     | 0.013747666 | 5.462236135  | F1 |
| FBtr0089084 | Eph    | 9.25E-08    | -6.107714474 | F2 |
| FBtr0084901 | CG5028 | 0.005199103 | 5.269815553  | F2 |
| FBtr0076263 | simj   | 0.012996463 | 5.803771619  | F2 |
| FBtr0074393 | CG5162 | 0.018783539 | 5.381305094  | F2 |
| FBtr0304571 | RyR    | 0.046679175 | 5.239173713  | F2 |

768

769

770 **Table S5.** *Drosophila* stock list and source information.

| name               | genotype                                                  | source              | stock number |
|--------------------|-----------------------------------------------------------|---------------------|--------------|
| CS                 | +                                                         | Bosco Lab           |              |
| OreR               | +                                                         | Bosco Lab           |              |
| Orb2[deltaQ]       | Orb2[deltaQ]                                              | Bosco Lab           |              |
| NPF-Gal4           | y[1] w[*]; P{w[+mC]=NPF-GAL4.1}2                          | Bloomington Stock C | 25681        |
| UAS-NPF            | UAS-NPF                                                   | Shen Lab            |              |
| Elav-Gal4          | Elav-Gal4                                                 | Bosco Lab           |              |
| UAS-NPF[RNAi]      | y[1] v[1]; P{y[+t7.7] v[+t1.8]=TRiP.JF02555}attP2         | Bloomington Stock C | 27237        |
| UAS-NPFR[RNAi]     | y[1] v[1]; P{y[+t7.7] v[+t1.8]=TRiP.JF01959}attP2         | Bloomington Stock C | 25939        |
| UAS-Dcp1[RNAi]     | y[1] v[1]; P{y[+t7.7] v[+t1.8]=TRiP.HM05120}attP2         | Bloomington Stock C | 28909        |
| UAS-Drice[RNAi]    | y[1] sc[*] v[1]; P{y[+t7.7] v[+t1.8]=TRiP.HMS00398}attP2  | Bloomington Stock C | 32403        |
| Mat $\alpha$ -Gal4 | w[*]; P{w[+mC]=matalpha4-GAL-VP16}V37                     | Bloomington Stock C | 7063         |
| ninaB              | w[*]/Dp(1;Y)y[+]; ninaB[1], P{w[+mC]=UAS-ninaB.G}3        | Bloomington Stock C | 24776        |
| compound ch-II     | C(2)EN, b[1] pr[1]                                        | Bloomington Stock C | 1112         |
| compound ch-II     | C(2)EN, bw[1] sp[1]                                       | Bloomington Stock C | 1020         |
| compound ch-II     | C(3)EN, Diap1[1] st[1]                                    | Bloomington Stock C | 1114         |
| compound ch-II     | C(3)EN, st[1] cu[1] e[s]                                  | Bloomington Stock C | 1117         |
| Df(3)10642         | w[1118]; Df(3R)ED10642, P{3'.RS5+3.3'}ED10642/TM6C, Sb[1] | Bloomington Stock C | 9482         |
| Df(3)BSC472        | w[1118]; Df(3R)BSC472/TM6C, Sb[1] cu[1]                   | Bloomington Stock C | 24976        |
| Df(3)BSC510        | w[1118]; Df(3R)BSC510/TM6C, Sb[1] cu[1]                   | Bloomington Stock C | 25014        |
| yw                 | y[1]w[1]                                                  | Bloomington Stock C | 1495         |

771

772
